32 **Abstract**

33 Pericentromeric satellite repeats are enriched in 5-methylcytosine (5mC). Loss of 5mC at  
34 these sequences is common in cancer and is a hallmark of Immunodeficiency,  
35 Centromere and Facial abnormalities (ICF) syndrome. While the general importance of  
36 5mC is well-established, the specific functions of 5mC at pericentromeres are less clear.  
37 To address this deficiency, we generated a viable animal model of pericentromeric  
38 hypomethylation through mutation of the ICF-gene *ZBTB24*. Deletion of zebrafish *zbtb24*  
39 caused a progressive loss of 5mC at pericentromeres and ICF-like phenotypes.  
40 Hypomethylation of these repeats triggered derepression of pericentromeric transcripts  
41 and activation of an interferon-based innate immune response. Injection of  
42 pericentromeric RNA is sufficient to elicit this response in wild-type embryos, and mutation  
43 of the MDA5-MAVS dsRNA-sensing machinery blocks the response in mutants. These  
44 findings identify activation of the innate immune system as an early consequence of  
45 pericentromeric hypomethylation, implicating derepression of pericentromeric transcripts  
46 as a trigger of autoimmunity.

## 47 **Introduction**

48 In vertebrate genomes, the majority of cytosine residues within CpG dinucleotides are  
49 methylated at the 5 position of the cytosine ring (5-methylcytosine, 5mC) (Suzuki and Bird,  
50 2008). 5mC is established by the *de novo* DNA methyltransferases of the Dnmt3 family,  
51 and is propagated by the maintenance DNA methyltransferase, Dnmt1 (Goll and Bestor,  
52 2005). In mice, frogs and zebrafish, mutation or morpholino-mediated depletion of *Dnmt1*  
53 results in extensive genome-wide methylation loss and embryonic lethality (Anderson et  
54 al., 2009; Lei et al., 1996; Rai et al., 2006; Stancheva and Meehan, 2000). In these  
55 species, global methylation deficiencies are linked to a variety of adverse outcomes  
56 including deregulation of gene expression, derepression of transposons, elevated levels  
57 of DNA damage and increased genome instability during mitosis (Smith and Meissner,  
58 2013). Recent studies have further linked global hypomethylation to activation of antiviral  
59 signaling pathways in zebrafish mutated for *dnmt1* and in cancer cells treated with the  
60 DNA methyltransferase inhibitor 5-azacytidine (Chernyavskaya et al., 2017; Chiappinelli  
61 et al., 2015; Roulois et al., 2015). While these studies reinforce the general importance of  
62 DNA methylation in vertebrate development and tissue homeostasis, the extensive  
63 genome-wide loss of methylation in these models makes it difficult to assign significance  
64 to methylation deficiencies at any particular subclass of sequence.

65 The pericentromeric satellite sequences that juxtapose chromosome centromeres  
66 represent an essential structural component of chromosomes and a significant source of  
67 5mC in vertebrate genomes. These highly repetitive sequences appear particularly  
68 susceptible to methylation loss in cancer and senescent cells, although the consequences  
69 of this hypomethylation are not well understood (Erukashvily et al., 2007; Fanelli et al.,  
70 2008; Nakagawa et al., 2005; Narayan et al., 1998; Qu et al., 1999; Suzuki et al., 2002;  
71 Tsuda et al., 2002). In contrast to global hypomethylation, loss of 5mC at pericentromeric  
72 repeats is compatible with human development. Individuals with the rare, autosomal

73 recessive disorder Immunodeficiency, Centromere and Facial anomalies (ICF) syndrome  
74 show extensive hypomethylation of pericentromeric repeats, while methylation across the  
75 rest of the genome is relatively intact (Tuck-Muller et al., 2000; Weisenberger et al., 2005).  
76 Affected individuals usually die in late childhood or early adulthood, and exhibit variable  
77 symptoms including immunoglobulin deficiency, facial dysmorphism, growth retardation  
78 and a generalized failure to thrive (Ehrlich et al., 2008). Chromosome anomalies including  
79 whole-arm deletions and multiradial chromosomes have also been reported in mitogen-  
80 stimulated lymphocytes from ICF-patients. However, similar chromosome anomalies are  
81 not observed in primary tissues from affected individuals (Ehrlich, 2003).

82 Homozygosity mapping and whole-exome sequencing have separately implicated  
83 four genes in ICF syndrome: DNA Methyltransferase 3B (*DNMT3B*, ICF type-1), Zinc-  
84 finger and BTB domain containing 24 (*ZBTB24*, ICF type-2), Cell division cycle associated  
85 7 (*CDCA7*, ICF type-3) and Helicase, lymphoid-specific (*HELLS*, ICF type-4) (de Greef et  
86 al., 2011; Thijssen et al., 2015; Xu et al., 1999). Most of the described mutations in  
87 *DNMT3B* cause amino acid substitutions within the C-terminal catalytic domain,  
88 suggesting they may be hypomorphic. In contrast, the majority of mutations in *ZBTB24*,  
89 *CDCA7* and *HELLS* are predicted to cause loss of function. Mechanistically, *ZBTB24*,  
90 *CDCA7* and *HELLS* are thought to converge in a singular pathway that facilitates *DNMT3B*  
91 access to pericentromeric DNA (Jenness et al., 2018; Wu et al., 2016).

92 To date, most studies of pericentromeric 5mC loss have been performed using  
93 transformed B-cell lines derived from ICF patients carrying mutations in *DNMT3B* (Ehrlich  
94 et al., 2008). Attempts to generate viable mouse models of pericentromeric  
95 hypomethylation through mutation of ICF genes have had limited success. Mice harboring  
96 ICF-like mutations in *Dnmt3b* exhibit some characteristics of ICF syndrome including small  
97 size and facial anomalies. However, most mice die within 24 hours of birth (Ueda et al.,  
98 2006). Global methylation profiles were not assessed in these mutants; but significant

99 hypomethylation was reported at both pericentromeric repeats and retroviral sequences.  
100 Similar perinatal lethality was observed following deletion of the mouse *HELLS* orthologue.  
101 In this case, mutations were accompanied by roughly 50% reductions in 5mC, and  
102 methylation loss was noted at pericentromeres, retroviruses and some single copy  
103 sequences (Tao et al., 2011). Deletion of the mouse *Zbtb24* gene was reported to cause  
104 embryonic lethality; but methylation changes in these mutants have not been investigated  
105 (Wu et al., 2016).

106 Here, we describe a viable model of pericentromeric methylation loss, generated  
107 through mutation of the zebrafish *zbtb24* gene. Homozygous mutant adults exhibited key  
108 phenotypic hallmarks of ICF syndrome including hypomethylation of pericentromeric  
109 satellite repeats. Hypomethylation of these repeats was first detected in mutants at 2  
110 weeks post fertilization (wpf) and became more severe as animals matured. This  
111 progressive methylation loss allowed us to investigate the primary consequences of  
112 pericentromeric hypomethylation in the context of a vertebrate animal. Using this model,  
113 we link derepression of transcripts from hypomethylated pericentromeres to activation of  
114 an interferon-based innate immune response, and we demonstrate that this response is  
115 mediated through the MDA5-MAVS dsRNA sensing machinery. Our findings provide  
116 insights into the earliest consequences of pericentromeric hypomethylation,  
117 demonstrating an unappreciated function for methylation of pericentromeric repeats in  
118 protecting against autoimmunity.

119

120 **Results**

121

122 **Mutation of zebrafish *zbtb24* causes ICF syndrome-like phenotypes**

123 The zebrafish genome encodes a single, well-conserved orthologue of ZBTB24, which we  
124 mutated using TAL effector nucleases (TALENs) (**Figure 1A** and **Figure 1-figure**  
125 **supplement 1 and 2**). The recovered 7.9 kb deletion allele (*zbtb24<sup>mk22</sup>*; here after referred  
126 to as *zbtb24<sup>Δ</sup>*), eliminates coding sequence between exons 2 and 5 (**Figure 1B**). Animals  
127 that were homozygous for this deletion lacked detectable *zbtb24* transcripts, suggesting  
128 *zbtb24<sup>Δ</sup>* is a null allele (**Figure 1-figure supplement 2D**). *Zbtb24<sup>Δ/Δ</sup>* embryos were born to  
129 heterozygous parents at the expected Mendelian ratios and had no obvious morphological  
130 abnormalities during the first two weeks of development (**Figure 1C**). Phenotypes that  
131 were reminiscent of ICF syndrome emerged as animals matured. Consistent with the small  
132 stature observed in ICF syndrome, by 3-4 weeks post fertilization (wpf), *zbtb24<sup>Δ/Δ</sup>* mutant  
133 zebrafish were smaller than wild-type siblings raised under identical conditions, and this  
134 size reduction persisted into adulthood (**Figure 1D-F**). As adults, *zbtb24<sup>Δ/Δ</sup>* mutants  
135 exhibited facial anomalies that were characterized by a quantifiable elongation of the snout  
136 (**Figure 1G-H**). We also noted evidence of hypogammaglobulinemia in the presence of  
137 normal lymphoid cell numbers, which is an immunological hallmark of ICF syndrome  
138 (**Figure 1I-J**). Significant death was noted among homozygous mutants at 4 months of  
139 age and fewer than 10% of *zbtb24<sup>Δ/Δ</sup>* animals survived beyond 8 months (**Figure 1K**).  
140 Similar phenotypes were observed in zebrafish that were homozygous for a second  
141 independently-isolated mutant allele of *zbtb24* (*zbtb24<sup>mk19</sup>*) (**Figure 1-figure supplement**  
142 **3**). Taken together, these findings identify *zbtb24* homozygous mutant zebrafish as a  
143 faithful animal model of ICF syndrome phenotypes.

144

145 **Progressive methylation loss at pericentromeric repeats in *zbtb24* mutants**

146 Pericentromeric satellite type-1 (Sat1) repeats are found on all zebrafish chromosomes  
147 and comprise 5-8% of the zebrafish genome (Phillips and Reed, 2000). As expected, we  
148 found that Sat1 sequences from wild-type adults were resistant to digestion with the  
149 methylation sensitive restriction enzyme HpyCH4IV, indicating that these pericentromeric  
150 repeats were heavily methylated. In contrast to wildtype, Sat1 sequences from *zbtb24*<sup>Δ/Δ</sup>  
151 and *zbtb24*<sup>mk19/mk19</sup> mutant adults were readily digested with HpyCH4IV, indicating  
152 extensive loss of methylation at these repeats (**Figure 2A-B** and **Figure 2-figure**  
153 **supplement 1A**). Comparable Sat1 methylation deficiencies were observed when DNA  
154 was isolated from dissected adult brain, skin, muscle and fin, suggesting that these  
155 sequences were similarly hypomethylated in most adult tissues (**Figure 2-figure**  
156 **supplement 1B** and **Figure 2-figure supplement 2A**).

157 Somewhat unexpectedly, we found that pericentromeric methylation loss in  
158 *zbtb24*<sup>Δ/Δ</sup> mutants was progressive. While extensive hypomethylation of Sat1 sequences  
159 was detected in adults lacking *zbtb24*, similar hypomethylation was not observed in  
160 mutants at 1 wpf (**Figure 2C-D**). At 2 wpf, *zbtb24* mutants exhibited roughly 3-fold  
161 increases in HpyCH4IV digestion, and sensitivity to digestion became increasingly  
162 pronounced in older animals (**Figure 2C-D**). By 32 weeks, Sat1 sequences from *zbtb24*  
163 mutants exhibited a 23-fold increase in HpyCH4IV digestion compared to wildtype,  
164 suggesting a greater than 95% reduction in methylation of these repetitive sequence  
165 blocks.

166

### 167 ***Zbtb24* mutants exhibit modest reductions in 5mC at non-pericentromeric** 168 **sequences**

169 To clarify whether additional sequences were hypomethylated in *zbtb24* mutants,  
170 we performed Enhanced Reduced Representation Bisulfite Sequencing (ERRBS) using  
171 genomic DNA isolated from the fins of three *zbtb24*<sup>Δ/Δ</sup> mutant adults and three wild-type

172 siblings at 25 wpf (Garrett-Bakelman et al., 2015). At this stage, Sat1 sequences from  
173 isolated fins were 20-fold more sensitive to HypCH4IV in *zbtb24* mutants compared to  
174 controls, indicating extensive loss of DNA methylation at pericentromeric repeats (**Figure**  
175 **2-figure supplement 2A-B**). We then used ERRBS data to interrogate the methylation  
176 status of 979,971 non-pericentromeric CpG sites across the genome in the same tissue  
177 samples. Our analysis revealed a strong correlation between genome wide 5mC levels in  
178 wild-type and *zbtb24*<sup>Δ/Δ</sup> mutant adults (Pearson's correlation value of 0.928), although  
179 overall methylation levels were reduced by ~10% in mutants (**Figure 2E** and **Figure 2-**  
180 **figure supplement 2C**). This 10% methylation reduction in mutants consisted primarily of  
181 small-magnitude changes in 5mC across the genome, with only 1.3% (13,205) of  
182 examined CpG dinucleotides exhibiting methylation differences of greater than 20%.  
183 Consistent with this finding, at a threshold of 20% change (p-value<0.01), only 55  
184 differentially methylated regions (DMRs) were identified between wild-type and *zbtb24*<sup>Δ/Δ</sup>  
185 adults (**Supplementary File 4**). Methylation levels at endogenous retroviruses and other  
186 transposable elements were also examined by methylation sensitive restriction digest. All  
187 tested elements were similarly resistant to digestion in *zbtb24*<sup>Δ/Δ</sup> mutant adults and wild-  
188 type siblings, indicating that these sequences are comparably methylated in both  
189 genotypes (**Figure 2-figure supplement 3**). Collectively, these data reveal limited  
190 methylation changes at non-pericentromeric CpG sites across the genome.

191

## 192 **Mutation of *zbtb24* causes activation of innate immune response genes**

193 To gain insights into the early consequences of methylation loss in *zbtb24* mutants, we  
194 performed transcriptome analysis on RNA isolated from wild-type and *zbtb24*<sup>Δ/Δ</sup> zebrafish  
195 at 2 wpf. At this stage, *zbtb24*<sup>Δ/Δ</sup> mutants remain morphologically indistinguishable from  
196 wildtype, but show clear hypomethylation of pericentromeric sequences. RNA-seq



197 identified 58 genes that were downregulated by more than 2-fold in *zbtb24*<sup>Δ/Δ</sup> larvae at 2  
198 wpf, while 119 were upregulated by 2-fold or more (**Figure 3A**). No gene enrichment  
199 signature was observed among downregulated genes. However, roughly 30% of  
200 upregulated genes were associated with activation of the innate immune system. In  
201 particular, we noted that upregulated transcripts included those associated with interferon  
202 stimulated genes (ISGs) and inflammatory cytokines (**Figure 3B**). Consistent with these  
203 observations, Gene Set Enrichment Analysis (GSEA) identified significant enrichment of  
204 genes involved in viral response, a key function of innate immune pathways (**Figure 3C**).  
205 Upregulation of ISGs was also observed in *zbtb24*<sup>Δ/Δ</sup> and *zbtb24*<sup>mk19/mk19</sup> mutants by qRT-  
206 PCR at 3 wpf, whereas the same genes were expressed at wild-type levels at 1 wpf  
207 (**Figure 3D-E** and **Figure 3-figure supplement 1**). No immune-related genes (and only 1  
208 gene differentially upregulated in the RNA-Seq) were found within 100kb of identified  
209 DMRs, suggesting that direct loss of methylation at these sequences was unlikely to cause  
210 the response (**Figure 2-figure supplement 2D** and **Supplementary File 4**).

211

## 212 **The innate immune response in *zbtb24* mutants is mediated by sensors of cytosolic** 213 **RNA**

214 The innate immune system represents an ancient defense system in which pathogen-  
215 associated molecular patterns (PAMPs) are recognized by pattern recognition receptors  
216 (PRRs). These PRRs induce signaling cascades that drive the production of interferons  
217 and other inflammatory cytokines with antiviral and immune modulating functions  
218 (Schneider et al., 2014). In addition to extracellular pathogens, PRRs also recognize  
219 PAMPs associated with cell-intrinsic stimuli including DNA damage, endogenous retroviral  
220 RNA and RNA-DNA hybrids (Chiappinelli et al., 2015; Hartlova et al., 2015; Mankan et al.,  
221 2014; Roulois et al., 2015).

222 To clarify the origin of the response in *zbtb24* mutants, we examined the major  
223 families of PRRs involved in innate immunity. These include the Toll-like receptors (TLRs),  
224 which have broad functions in detecting PAMPs, the RIG-I like receptors (RLRs), which  
225 are involved in the detection of cytosolic RNA and cGAMP synthase (cGAS), which  
226 functions as a cytosolic sensor of DNA and RNA/DNA hybrids (Crowl et al., 2017).  
227 Mutations in key mediator proteins required to propagate interferon signaling from each  
228 PRR family were introduced onto the *zbtb24* mutant background and we tested the effect  
229 on ISG expression. Mutations in the zebrafish orthologs of *mitochondrial antiviral-signaling*  
230 *protein (mavs)*, which is an intermediate in RLR signaling and *stimulator of interferon*  
231 *genes (sting)*, which is involved in cGAS signaling were generated using CRISPR/Cas9  
232 technology (**Figure 4-figure supplement 1A-B**). The mutant allele of *Myeloid*  
233 *differentiation primary response 88 (myd88)*, which is required for signaling through most  
234 TLRs, was previously described (van der Vaart et al., 2013).

235 As in prior experiments, significant increases of the ISGs, *signal transducer and*  
236 *activator of transcription 1b (stat1b)* and *interferon regulatory factor (irf7)* were observed  
237 in *zbtb24*<sup>Δ/Δ</sup> larvae at 3 wpf by qRT-PCR (**Figure 4A-C**). Introduction of *myd88* or *sting*  
238 mutations had little impact on expression of these ISGs, as similar transcript levels were  
239 detected in *zbtb24*<sup>Δ/Δ</sup> single mutant animals compared to *myd88*<sup>hu3568/hu3568</sup>, *zbtb24*<sup>Δ/Δ</sup> or  
240 *sting*<sup>mk30/mk30</sup>; *zbtb24*<sup>Δ/Δ</sup> double mutants (**Figure 4A-B**). Sustained ISG expression in these  
241 double mutants suggests limited roles for TLR and cGAS PRRs in mediating the interferon  
242 response in *zbtb24* mutants. In contrast to *myd88* and *sting*, mutation of *mavs* suppressed  
243 *stat1b* and *irf7* upregulation in *zbtb24*<sup>Δ/Δ</sup> mutant animals. Expression levels of *irf7* and  
244 *stat1b* were reduced 2- and 4-fold respectively in *mavs*<sup>mk28/mk28</sup>; *zbtb24*<sup>Δ/Δ</sup> double mutants  
245 when compared to *zbtb24*<sup>Δ/Δ</sup> single mutant zebrafish, indicating a requirement for *mavs* in  
246 the upregulation of these ISGs (**Figure 4C**). This finding implicates RLR signaling in the

247 activation of the innate immune system in *zbtb24* mutants and suggests a cytosolic RNA  
248 trigger for the response.

249

250 **Pericentromeric RNA transcripts are sufficient to trigger the interferon response in**  
251 ***zbtb24* mutants**

252 Given known roles for DNA methylation in transcriptional repression, we next  
253 tested whether loss of methylation at pericentromeric sequence resulted in increased  
254 levels of Sat1 transcripts that could trigger the RNA mediated interferon response.  
255 Consistent with this model, strong derepression of Sat1 RNA from hypomethylated  
256 pericentromeres was noted in *zbtb24* mutant adults (**Figure 5A** and **Figure 5-figure**  
257 **supplement 1A**), whereas transcripts for other dispersed repetitive elements remained  
258 unchanged between mutants and wildtype (**Figure 5-figure supplement 1B**). Increases  
259 in Sat1 transcripts correlated with levels of *irf7* expression in adult zebrafish ( $r=0.77$ ), and  
260 upregulation of Sat1 transcripts coincided with the window of ISG induction during  
261 development (**Figure 5B-C**). Both sense and antisense transcripts were detected in  
262 mutants using TAG-aided sense/antisense transcript detection (TASA-TD) strand-specific  
263 PCR (Henke et al., 2015), suggesting the potential for derepressed Sat1 transcripts to  
264 form double stranded RNAs (**Figure 5D-E**).

265 To determine whether Sat1 transcripts were sufficient to activate an innate immune  
266 response, in vitro synthesized RNA corresponding to Sat1 sense and antisense sequence  
267 was injected into wild-type embryos at the 1-cell stage. Expression of the ISGs *stat1b*, *irf7*,  
268 *irf1b* and *mxr* was then assessed at 8 hours post fertilization. Injection of Sat1 RNA was  
269 sufficient to cause a 3 to 4-fold upregulation in expression of these ISGs, whereas injection  
270 of control transcripts encoding the dsRed fluorophore had no effect on expression of these  
271 genes (**Figure 5F**). These results functionally link the derepression of Sat1 transcripts to  
272 the activation of the innate immune response in *zbtb24* mutants.

273 **The cytosolic dsRNA helicase MDA5 is required for the interferon response in**  
274 ***zbtb24* mutants**

275 Finally, we sought to identify the specific PRR required for the interferon response in  
276 *zbtb24* mutants. The RLR family of PRRs consists of two RNA helicases that signal  
277 through Mavs: Melanoma Differentiation-Associated protein 5 (Mda5) and Retinoic acid-  
278 inducible gene I (Rig-I). Rig-I binds 5' triphosphorylated RNA molecules, whereas Mda5  
279 recognizes long double-stranded RNAs in the cytosol (Crowl et al., 2017). Given that 5'  
280 triphosphorylation of RNAs is a typical viral signature that is unlikely to be present on  
281 endogenous RNA transcripts, we reasoned that Mda5 was a more likely candidate for the  
282 receptor. To test the requirement for *mda5*, we generated a 7 base-pair deletion in this  
283 gene that disrupted the DEAD box helicase domain (**Figure 4-figure supplement 1C**).  
284 This *mda5*<sup>mk29</sup> allele was then introduced onto the *zbtb24* mutant background, and  
285 expression of the ISGs *stat1b* and *irf7* was examined at 3 wpf. Homozygous mutation of  
286 *mda5* was sufficient to restore *stat1b* and *irf7* expression to wild-type levels in *zbtb24*<sup>Δ/Δ</sup>  
287 mutant larvae, suggesting that Mda5 is the primary PPR required for the response (**Figure**  
288 **6A**). This requirement was further validated by RNA-seq, which revealed that a broad  
289 panel of ISGs that showed elevated expression in *zbtb24* single mutants were no longer  
290 upregulated in *mda5*<sup>mk29/mk29</sup>; *zbtb24*<sup>Δ/Δ</sup> double mutants (**Figure 6B-C**).

291 Taken together, these results support a model in which derepression of transcripts  
292 from hypomethylated pericentromeres triggers activation of the innate immune system  
293 through the Mda5/Mavs viral RNA recognition pathway (**Figure 6D**). These findings  
294 identify roles for pericentromeric RNA as a trigger of autoimmunity and reveal important  
295 functions for pericentromeric methylation in suppressing the generation of these  
296 immunostimulatory transcripts. Based on these results, we propose that induction of the  
297 innate immune system is one of the earliest *in vivo* consequences of pericentromeric  
298 methylation loss.

299 **Discussion**

300 In this study, we describe a viable animal model of ICF syndrome which recapitulates key  
301 phenotypic hallmarks of the disease including slow growth, facial anomalies,  
302 immunoglobulin deficiencies and reduced lifespan. Given that previous attempts to model  
303 ICF syndrome have resulted in perinatal or embryonic lethality (Geiman et al., 2001; Ueda  
304 et al., 2006; Wu et al., 2016), this zebrafish model provides an important new resource for  
305 understanding ICF disease etiology during juvenile and adult life stages. In particular,  
306 *zbtb24* mutant zebrafish will be useful for understanding phenotypes such as  
307 immunoglobulin deficiency, which have not been observed in mouse models and are  
308 difficult to study in cell culture systems.

309 Methylation analysis of *zbtb24* mutant zebrafish suggests that the general  
310 methylation landscape in these mutants is comparable with that in ICF syndrome. Recent  
311 methylome analysis of primary blood from ICF patients identified methylation changes of  
312 greater than 20% at roughly 3% of examined CpG dinucleotides. Significant changes in  
313 methylation of retroviruses and other dispersed repeats were not observed in these  
314 patients (Velasco et al., 2018). Consistent with these findings, our ERRBS analysis  
315 revealed methylation changes of greater than 20% at roughly 1.3% of assayed CpG  
316 dinucleotides and found methylation of dispersed repeats to be similar between wildtype  
317 and in *zbtb24* mutant zebrafish.

318 In the current study, methylation levels at pericentromeric Sat1 sequences could  
319 not be quantified by ERRBS, as this technique relies on Msp1 restriction digest to enrich  
320 for CpG containing sequences, and zebrafish Sat1 repeats are lacking in this restriction  
321 site. Instead we employed digestion with the methylation sensitive restriction enzyme  
322 HpyCH4IV to measure methylation at these repeats. This approach remains the most  
323 effective way to assess methylation at highly repetitive sequences. At 32 wpf, we observed  
324 increases in sensitivity to HpyCH4IV digestion that are consistent with up to 95%

325 reductions in methylation at Sat1 pericentromeric repeats in *zbtb24* mutants, while  
326 methylation of these sequences was similar to wildtype at 1 wpf. This progressive loss of  
327 5mC implicates Zbtb24 in regulating the long-term maintenance of methylation at  
328 pericentromeric repeats. We note that the onset of ICF-like growth defects in *zbtb24*  
329 mutant zebrafish emerged in the weeks following Sat1 methylation loss. In at least one  
330 case of ICF syndrome type 2, growth reductions and immunodeficiency were also reported  
331 to develop with age, raising the possibility that similar progressive methylation loss may  
332 impact ICF etiology in humans (von Bernuth et al., 2014). It is also possible that Zbtb24  
333 functions in both maintenance and establishment of pericentromeric methylation, but that  
334 requirements for establishment are masked by maternally deposited RNA in *zbtb24*  
335 mutant zebrafish lines. Unfortunately, *zbtb24* homozygous mutant zebrafish are sterile,  
336 preventing the generation of the maternal-zygotic mutants required to address this  
337 question.

338         In the current study, we take advantage of the progressive Sat1 methylation loss  
339 in *zbtb24* mutants to identify activation of interferon signaling as one of the earliest *in vivo*  
340 consequences of pericentromeric hypomethylation. This phenotype cannot be attributed  
341 to defects in adaptive immunity, as the zebrafish adaptive immune system is not functional  
342 until roughly 4 wpf (Trede et al., 2004). Induction of an interferon response has been  
343 reported in the context of global hypomethylation in cancer cell lines treated with the DNA  
344 methyltransferase inhibitor 5-azacytidine and in zebrafish mutated for the maintenance  
345 DNA methyltransferase machinery (Chernyavskaya et al., 2017; Chiappinelli et al., 2015;  
346 Roulois et al., 2015). In each of these cases induction of the interferon response was  
347 attributed to massive derepression of endogenous retroviral elements.

348         Our results are distinguished from these earlier studies in that we identify  
349 hypomethylation of pericentromeric sequences and subsequent derepression of  
350 associated satellite transcripts as a previously unappreciated trigger of innate immunity.

351 Immunostimulatory motifs have been noted in pericentromeric RNAs derived from mouse  
352 and humans, and transcripts derived from these repeats have been observed in *p53* null  
353 mouse fibroblasts following global methylation loss (Leonova et al., 2013; Tanne et al.,  
354 2015). However, while these studies suggest the potential for pericentromeric  
355 hypomethylation to drive an interferon response in diverse vertebrate species,  
356 experimental evidence in support of this model has been lacking. Here we demonstrate a  
357 causative link between derepression of pericentromeric RNAs and the interferon  
358 response, and identify a requirement for Mda5/Mavs in mediating the response. Our  
359 findings suggest that aberrant upregulation of both sense and antisense transcripts  
360 derived from pericentromeric repeats creates an abundance of double stranded RNAs  
361 within the cytosol, which mimic features of double stranded RNA viruses. This finding  
362 raises the possibility that this pathway may also recognize additional endogenous long  
363 dsRNAs that lack viral origin.

364         While mutation of *mda5/mavs* rescued the interferon response in *zbtb24* mutants,  
365 *mda5/mavs* mutation had little impact on other ICF phenotypes observed in *zbtb24*  
366 mutants. Therefore, we find it unlikely that the interferon response drives ICF etiology.  
367 Rather this response represents an additional consequence of pericentromeric  
368 hypomethylation. Hypomethylation of pericentromeric sequences is compatible with  
369 human viability and is observed in abnormal cell contexts including cancer and  
370 senescence. Massive increases in pericentromeric transcripts and upregulation of  
371 interferon genes have both been noted in cancer (Cheon et al., 2014; Ting et al., 2011).  
372 Our data raise the possibility that pericentromeric hypomethylation and subsequent  
373 derepression of associated RNAs represents an important but underappreciated trigger of  
374 autoimmunity in a variety of disease states.

375

376 **Materials and Methods**

377

378 **Zebrafish husbandry**

379 Zebrafish husbandry and care were conducted in full accordance with animal care and  
380 use guidelines with approval by the Institutional Animal Care and Use Committees at  
381 Memorial Sloan Kettering Cancer Center and the University of Georgia. Zebrafish were  
382 raised under standard conditions at 28° C. Wild-type lines were of the AB background. All  
383 mutant alleles are summarized in Supplementary File 1.

384

385 **TALEN and CRISPR mutagenesis**

386 TALEN sequences were selected using Targeter 2.0 software (Doyle et al., 2012). TAL  
387 repeat assembly was achieved using the Golden Gate assembly method, and assembled  
388 repeats were integrated into the GoldyTALEN scaffold (Bedell et al., 2012; Cermak et al.,  
389 2011). Assembled vectors served as templates for in vitro mRNA transcription using the  
390 T3 mMessage mMachine kit (Ambion) according to manufacturer's instructions. 50–100pg  
391 mRNA was injected into wild-type embryos at the one-cell stage. Injected embryos were  
392 raised to adulthood and F1 progeny were screened for germline transmission of mutations  
393 as previously described (Li et al., 2015). Primers used for detection of mutations and  
394 subsequent genotyping are included in Supplementary File 1.

395

396 Target selection for CRISPR/Cas9 mediated mutagenesis was performed using  
397 CHOPCHOP (Labun et al., 2016). sgRNA templates were generated either by cloning into  
398 pT7-gRNA as described by (Jao et al., 2013) or using the oligo-based approach described  
399 in (Gagnon et al., 2014) and (Burger et al., 2016). All template oligos are listed in  
400 Supplementary File 3. sgRNAs were in vitro transcribed from their respective templates  
401 using T7 RNA polymerase (Promega) as per manufacturer protocol. Cas9 RNA was in



402 vitro transcribed from the pT3TS-nls-zCas9-nls plasmid (Jao et al., 2013) using the T3  
403 mMessage mMachine Kit (Ambion). For mutagenesis, 200-400ng of sgRNA and ~500ng  
404 of Cas9 mRNA were co-injected into wild-type embryos at the one-cell stage. Injected  
405 embryos were raised to adulthood, and F1 progeny were screened for germline  
406 transmission of mutations as previously described (Li et al., 2015). Primers used for  
407 detection of mutations and subsequent genotyping are included in Supplementary File 1.

408

#### 409 **Zebrafish imaging and length measurements**

410 All bright field imaging of zebrafish larvae and adult was performed using Olympus MVX10  
411 with CellSens Standard software. Standard-length was documented using ImageJ as  
412 defined in (Parichy et al., 2009). Photoshop (Adobe) adjustments to brightness and  
413 contrast were equally applied to all images of whole zebrafish in order to improve  
414 visualization.

415

#### 416 **FACS Analysis of Whole Kidney Marrow**

417 Adult zebrafish at 6 months were sacrificed with a combination of tricaine (Sigma-Aldrich,  
418 CAS number 886-86-2) and rapid chilling. Whole kidneys were dissected using forceps  
419 and placed in 0.9× PBS/5% FCS. Manual disaggregation using a P1000 pipette resulted  
420 in single cell suspensions. Cells were filtered over a 40 µm nylon mesh filter, and  
421 resuspended in PBS/FCS to give a final concentration of 100,000 cells/µl. FACS sorting  
422 of single cells were analyzed for forward/side scatter profiles. FACS data were analyzed  
423 using FloJo software.

424

#### 425 **DNA Methylation Analysis**

426 For Southern blot analysis, 1 µg of purified total genomic DNA was digested with the  
427 indicated methylation sensitive restriction enzyme, fractionated by electrophoresis through

428 a 0.9% agarose gel and transferred to nylon membrane. Probes were PCR amplified using  
429 primers in Supplementary File 2 and radiolabeled with  $^{32}\text{P}$ -dCTP using Rediprime<sup>TM</sup> II  
430 Random Prime Labelling System (Amersham) according to manufacturer protocol.  
431 Hybridization signals were imaged and analyzed using a Typhoon phosphorimager (GE  
432 Life Sciences). Signal intensities were measured using ImageJ. Methylation changes at  
433 Sat1 was quantified as a ratio of the intensity of the unmethylated / methylated blot regions  
434 as indicated in the respective blot.  
435 HypCH4IV was selected for Sat1 methylation analysis over the more traditional  
436 Msp1/HpaII isoschizomer pair because Sat1 sequences lack the CCGG sites that are  
437 recognized by these enzymes.

438

#### 439 **Enhanced Reduced Representation Bisulfite Sequencing (ERRBS)**

440 50 ng of high quality genomic DNA was prepared from fin tissue from adult zebrafish at  
441 24 wpf as previously described (Garrett-Bakelman et al., 2015). DNA was digested with  
442 Msp1. Bisulphite conversion rates (calculated using non-CpG methylation conversion  
443 rates) ranged from 99.6 to 99.7% for all samples (**Figure 2-figure supplement 2C**).  
444 Amplified libraries were sequenced on the Hiseq2000 platform for 50 cycles single end  
445 read runs. ERRBS data were filtered for sequence adapters, limited to the first 29 bp of  
446 the read (Boyle et al., 2012), and mapped to the zebrafish genome (danRer7) using  
447 BSmap (v 2.90) (Xi and Li, 2009). Methylation scores were calculated as the number of  
448 unconverted reads divided by the number of total reads at each CpG site. DMRs with at  
449 least a 0.2 change in methylation were determined using DSS (delta=0.2,  
450 p.threshold=0.01) (Park and Wu, 2016). Sat1 sequences are deficient in Msp1 sites, and  
451 are therefore not included in ERRBS data.

452

#### 453 **RNA Expression Analysis**

454 For qRT-PCR, total RNA was isolated using Trizol (Invitrogen) and precipitated with  
455 isopropanol. RNA used for assaying expression of repeat sequences subsequently was  
456 treated with DNase using TURBO DNA-free™ Kit (Ambion) prior to analyses. RNA was  
457 converted to cDNA using GoScript™ Reverse Transcriptase Kit (Promega) and Real Time  
458 PCR was performed using an Applied Biosystems 7500 PCR Machine. Analysis was  
459 performed using the  $2^{-\Delta\Delta Ct}$  method, with relative mRNA levels of all transcripts normalized  
460 to  $\beta$ -actin1. All primer sequences are listed in Supplementary File 2.

461

462 For Northern blot analysis, total RNA was extracted with using Trizol (Invitrogen). 2  $\mu$ g of  
463 RNA was subjected to electrophoresis on 1% agarose gel and transferred to Amersham  
464 Hybond-N+ membrane (GE Healthcare). The membrane was probed with  $^{32}$ P-dCTP  
465 radiolabeled Sat1 DNA probe at 42°C. Hybridization signals were imaged and analyzed  
466 using a Typhoon phosphorimager (GE Life Sciences).

467

468 TAG-aided sense/antisense transcript detection (TASA-TD) strand-specific PCR was  
469 performed as described by (Henke et al., 2015). Oligos used are listed in Supplementary  
470 File 3.

471

## 472 **Transcriptome sequencing**

473 After RiboGreen quantification and quality control by Agilent BioAnalyzer, 500 ng of total  
474 RNA underwent polyA selection and TruSeq library preparation according to instructions  
475 provided by Illumina (TruSeq Stranded mRNA LT Kit), with 8 cycles of PCR. Samples  
476 were barcoded and run on a HiSeq 2500 High Output in a 50bp/50bp paired end run, using  
477 the TruSeq SBS v4 Kit (Illumina). An average of 45.3 million paired reads was generated  
478 per sample. The percent of mRNA bases averaged 62.8%.

479 For single-mutant RNA-seq analysis presented in Fig 3, reads were mapped to the  
480 Zebrafish genome (danRer7) using the rnaStar aligner v2.5.0a (Dobin et al., 2013). We  
481 used the two pass mapping method outlined in (Engstrom et al., 2013). The first mapping  
482 pass used a list of known annotated junctions from Ensemble. Novel junctions found in  
483 the first pass were then added to the known junctions and a second mapping pass was  
484 done (on the second pass the RemoveNoncanonical flag was used). Expression counts  
485 (counts per million, cpm) were computed from the mapped reads using HTSeq v0.5.3  
486 (Anders et al., 2015) and Ensemble D.rerio v79 gene annotations. Normalization and  
487 differential expression was performed using DESeq (Anders and Huber, 2010).

488

489 For RNA-seq analysis presented in Fig 6, raw RNA-seq FASTQ reads were trimmed for  
490 adapters and preprocessed to remove low-quality reads using Trimmomatic v0.33  
491 (arguments: LEADING:3 TRAILING:3 MINLEN:36) (Bolger et al., 2014) prior to mapping  
492 to the *Danio rerio* GRCz10 reference genome assembly. Reads were mapped using  
493 TopHat v2.1.1 (Kim et al., 2013) supplied with a reference General Features File (GFF) to  
494 the *Danio rerio*GRCz10 reference genome assembly, and with the following arguments: -  
495 i 10 -l 5000 --library-type fr-firststrand. Gene expression was estimated using Cuffquant  
496 (a tool from Cufflinks v2.2.1), with following arguments --library-type fr-  
497 firststrand. Expression level were normalized in FPKM units by Cuffnorm (a tool from  
498 Cufflinks v2.2.1), with following arguments --library-type fr-firststrand.

499

## 500 **RNA synthesis and injections**

501 Sat1 RNA and dsRed RNAs were *in vitro* transcribed using Riboprobe® *in vitro*  
502 transcription systems (Promega). Oligos to amplify the DNA template for *in vitro*  
503 transcription are included in Supplementary File 3. Sense and anti-sense transcripts were  
504 transcribed *in vitro* using the T3 and T7 RNA polymerases respectively. RNA was purified

505 illustra MicroSpin G-50 Columns (GE Healthcare) and 50 ng of sense and antisense RNA  
506 was co-injected into zebrafish embryos at the 1-cell stage.

507

#### 508 **Statistical Analysis**

509 The Student unpaired 2-tailed t-test was used for statistical analysis unless specified  
510 otherwise. Statistical analysis was performed using GraphPad PRISM software.

511

#### 512 **Accession Number**

513 All ERRBS and RNA-Seq data reported in this paper have been deposited in GEO under  
514 the accession GSE116360. The data is currently private and will be released at  
515 publication.

516

517 **Acknowledgements**

518

519 This research was supported by a grant from the National Institutes of Health  
520 (R01GM11009) to M.G.G. We thank the Goll laboratory for helpful discussions and critical  
521 reading of the manuscript. We acknowledge the use of the Integrated Genomics Operation  
522 Core of MSKCC, funded by the NCI Cancer Center Support Grant (CCSG, P30 CA08748),  
523 Cycle for Survival, and the Marie-Josée and Henry R. Kravis Center for Molecular  
524 Oncology. We also acknowledge the use of the Bioinformatics core of MSKCC for support  
525 with sequence analysis. ERRBS was performed in the Weill Cornell Medicine  
526 Epigenomics Core Facility.

527

528 **References**

529

- 530 Anders, S., and Huber, W. (2010). Differential expression analysis for sequence count  
531 data. *Genome Biol* 11, R106.
- 532 Anders, S., Pyl, P.T., and Huber, W. (2015). HTSeq--a Python framework to work with  
533 high-throughput sequencing data. *Bioinformatics* 31, 166-169.
- 534 Anderson, R.M., Bosch, J.A., Goll, M.G., Hesselson, D., Dong, P.D., Shin, D., Chi, N.C.,  
535 Shin, C.H., Schlegel, A., Halpern, M., *et al.* (2009). Loss of Dnmt1 catalytic activity reveals  
536 multiple roles for DNA methylation during pancreas development and regeneration. *Dev*  
537 *Biol* 334, 213-223.
- 538 Bedell, V.M., Wang, Y., Campbell, J.M., Poshusta, T.L., Starker, C.G., Krug, R.G., 2nd,  
539 Tan, W., Penheiter, S.G., Ma, A.C., Leung, A.Y., *et al.* (2012). In vivo genome editing  
540 using a high-efficiency TALEN system. *Nature* 491, 114-118.
- 541 Bolger, A.M., Lohse, M., and Usadel, B. (2014). Trimmomatic: a flexible trimmer for  
542 Illumina sequence data. *Bioinformatics* 30, 2114-2120.
- 543 Boyle, P., Clement, K., Gu, H., Smith, Z.D., Ziller, M., Fostel, J.L., Holmes, L., Meldrim, J.,  
544 Kelley, F., Gnirke, A., *et al.* (2012). Gel-free multiplexed reduced representation bisulfite  
545 sequencing for large-scale DNA methylation profiling. *Genome Biol* 13, R92.
- 546 Burger, A., Lindsay, H., Felker, A., Hess, C., Anders, C., Chiavacci, E., Zaugg, J., Weber,  
547 L.M., Catena, R., Jinek, M., *et al.* (2016). Maximizing mutagenesis with solubilized  
548 CRISPR-Cas9 ribonucleoprotein complexes. *Development* 143, 2025-2037.
- 549 Cermak, T., Doyle, E.L., Christian, M., Wang, L., Zhang, Y., Schmidt, C., Baller, J.A.,  
550 Somia, N.V., Bogdanove, A.J., and Voytas, D.F. (2011). Efficient design and assembly of  
551 custom TALEN and other TAL effector-based constructs for DNA targeting. *Nucleic Acids*  
552 *Res* 39, e82.
- 553 Cheon, H., Borden, E.C., and Stark, G.R. (2014). Interferons and their stimulated genes  
554 in the tumor microenvironment. *Semin Oncol* 41, 156-173.
- 555 Chernyavskaya, Y., Mudbhary, R., Zhang, C., Tokarz, D., Jacob, V., Gopinath, S., Sun,  
556 X., Wang, S., Magnani, E., Madakashira, B.P., *et al.* (2017). Loss of DNA methylation in  
557 zebrafish embryos activates retrotransposons to trigger antiviral signaling. *Development*  
558 144, 2925-2939.
- 559 Chiappinelli, K.B., Strissel, P.L., Desrichard, A., Li, H., Henke, C., Akman, B., Hein, A.,  
560 Rote, N.S., Cope, L.M., Snyder, A., *et al.* (2015). Inhibiting DNA Methylation Causes an  
561 Interferon Response in Cancer via dsRNA Including Endogenous Retroviruses. *Cell* 162,  
562 974-986.
- 563 Crawl, J.T., Gray, E.E., Pestal, K., Volkman, H.E., and Stetson, D.B. (2017). Intracellular  
564 Nucleic Acid Detection in Autoimmunity. *Annu Rev Immunol* 35, 313-336.
- 565 de Greef, J.C., Wang, J., Balog, J., den Dunnen, J.T., Frants, R.R., Straasheijm, K.R.,  
566 Aytekin, C., van der Burg, M., Duprez, L., Ferster, A., *et al.* (2011). Mutations in ZBTB24  
567 are associated with immunodeficiency, centromeric instability, and facial anomalies  
568 syndrome type 2. *Am J Hum Genet* 88, 796-804.
- 569 Dobin, A., Davis, C.A., Schlesinger, F., Drenkow, J., Zaleski, C., Jha, S., Batut, P.,  
570 Chaisson, M., and Gingeras, T.R. (2013). STAR: ultrafast universal RNA-seq aligner.  
571 *Bioinformatics* 29, 15-21.
- 572 Doyle, E.L., Booher, N.J., Standage, D.S., Voytas, D.F., Brendel, V.P., Vandyk, J.K., and  
573 Bogdanove, A.J. (2012). TAL Effector-Nucleotide Targeter (TALE-NT) 2.0: tools for TAL  
574 effector design and target prediction. *Nucleic Acids Res* 40, W117-122.
- 575 Ehrlich, M. (2003). The ICF syndrome, a DNA methyltransferase 3B deficiency and  
576 immunodeficiency disease. *Clinical Immunology* 109, 17-28.

577 Ehrlich, M., Sanchez, C., Shao, C., Nishiyama, R., Kehrl, J., Kuick, R., Kubota, T., and  
578 Hanash, S.M. (2008). ICF, an immunodeficiency syndrome: DNA methyltransferase 3B  
579 involvement, chromosome anomalies, and gene dysregulation. *Autoimmunity* 41, 253-  
580 271.

581 Engstrom, P.G., Steijger, T., Sipos, B., Grant, G.R., Kahles, A., Ratsch, G., Goldman, N.,  
582 Hubbard, T.J., Harrow, J., Guigo, R., *et al.* (2013). Systematic evaluation of spliced  
583 alignment programs for RNA-seq data. *Nat Methods* 10, 1185-1191.

584 Erukashvily, N.I., Donev, R., Waisertreiger, I.S., and Podgornaya, O.I. (2007). Human  
585 chromosome 1 satellite 3 DNA is decondensed, demethylated and transcribed in  
586 senescent cells and in A431 epithelial carcinoma cells. *Cytogenet Genome Res* 118, 42-  
587 54.

588 Fanelli, M., Caprodossi, S., Ricci-Vitiani, L., Porcellini, A., Tomassoni-Ardori, F., Amatori,  
589 S., Andreoni, F., Magnani, M., De Maria, R., Santoni, A., *et al.* (2008). Loss of  
590 pericentromeric DNA methylation pattern in human glioblastoma is associated with altered  
591 DNA methyltransferases expression and involves the stem cell compartment. *Oncogene*  
592 27, 358-365.

593 Gagnon, J.A., Valen, E., Thyme, S.B., Huang, P., Akhmetova, L., Pauli, A., Montague,  
594 T.G., Zimmerman, S., Richter, C., and Schier, A.F. (2014). Efficient mutagenesis by Cas9  
595 protein-mediated oligonucleotide insertion and large-scale assessment of single-guide  
596 RNAs. *PLoS One* 9, e98186.

597 Garrett-Bakelman, F.E., Sheridan, C.K., Kacmarczyk, T.J., Ishii, J., Betel, D., Alonso, A.,  
598 Mason, C.E., Figueroa, M.E., and Melnick, A.M. (2015). Enhanced reduced representation  
599 bisulfite sequencing for assessment of DNA methylation at base pair resolution. *J Vis Exp*,  
600 e52246.

601 Geiman, T.M., Tessarollo, L., Anver, M.R., Kopp, J.B., Ward, J.M., and Muegge, K. (2001).  
602 Lsh, a SNF2 family member, is required for normal murine development. *Biochim Biophys*  
603 *Acta* 1526, 211-220.

604 Goll, M.G., and Bestor, T.H. (2005). Eukaryotic cytosine methyltransferases. *Annu Rev*  
605 *Biochem* 74, 481-514.

606 Hartlova, A., Erttmann, S.F., Raffi, F.A., Schmalz, A.M., Resch, U., Anugula, S.,  
607 Lienenklaus, S., Nilsson, L.M., Kroger, A., Nilsson, J.A., *et al.* (2015). DNA damage primes  
608 the type I interferon system via the cytosolic DNA sensor STING to promote anti-microbial  
609 innate immunity. *Immunity* 42, 332-343.

610 Henke, C., Strissel, P.L., Schubert, M.T., Mitchell, M., Stolt, C.C., Faschingbauer, F.,  
611 Beckmann, M.W., and Strick, R. (2015). Selective expression of sense and antisense  
612 transcripts of the sushi-ichi-related retrotransposon--derived family during mouse  
613 placentogenesis. *Retrovirology* 12, 9.

614 Jao, L.E., Wente, S.R., and Chen, W. (2013). Efficient multiplex biallelic zebrafish genome  
615 editing using a CRISPR nuclease system. *Proc Natl Acad Sci U S A* 110, 13904-13909.

616 Jenness, C., Giunta, S., Muller, M.M., Kimura, H., Muir, T.W., and Funabiki, H. (2018).  
617 HELLS and CDCA7 comprise a bipartite nucleosome remodeling complex defective in ICF  
618 syndrome. *Proc Natl Acad Sci U S A* 115, E876-E885.

619 Kim, D., Pertea, G., Trapnell, C., Pimentel, H., Kelley, R., and Salzberg, S.L. (2013).  
620 TopHat2: accurate alignment of transcriptomes in the presence of insertions, deletions  
621 and gene fusions. *Genome Biol* 14, R36.

622 Labun, K., Montague, T.G., Gagnon, J.A., Thyme, S.B., and Valen, E. (2016).  
623 CHOPCHOP v2: a web tool for the next generation of CRISPR genome engineering.  
624 *Nucleic Acids Research* 44, W272-W276.

625 Lei, H., Oh, S.P., Okano, M., Juttermann, R., Goss, K.A., Jaenisch, R., and Li, E. (1996).  
626 De novo DNA cytosine methyltransferase activities in mouse embryonic stem cells.  
627 *Development* 122, 3195-3205.



628 Leonova, K.I., Brodsky, L., Lipchick, B., Pal, M., Novototskaya, L., Chenchik, A.A., Sen,  
629 G.C., Komarova, E.A., and Gudkov, A.V. (2013). p53 cooperates with DNA methylation  
630 and a suicidal interferon response to maintain epigenetic silencing of repeats and  
631 noncoding RNAs. *Proc Natl Acad Sci U S A* *110*, E89-98.  
632 Li, C., Lan, Y., Schwartz-Orbach, L., Korol, E., Tahiliani, M., Evans, T., and Goll, M.G.  
633 (2015). Overlapping Requirements for Tet2 and Tet3 in Normal Development and  
634 Hematopoietic Stem Cell Emergence. *Cell Rep* *12*, 1133-1143.  
635 Mankan, A.K., Schmidt, T., Chauhan, D., Goldeck, M., Honing, K., Gaidt, M., Kubarenko,  
636 A.V., Andreeva, L., Hopfner, K.P., and Hornung, V. (2014). Cytosolic RNA:DNA hybrids  
637 activate the cGAS-STING axis. *EMBO J* *33*, 2937-2946.  
638 Nakagawa, T., Kanai, Y., Ushijima, S., Kitamura, T., Kakizoe, T., and Hirohashi, S. (2005).  
639 DNA hypomethylation on pericentromeric satellite regions significantly correlates with loss  
640 of heterozygosity on chromosome 9 in urothelial carcinomas. *J Urol* *173*, 243-246.  
641 Narayan, A., Ji, W., Zhang, X.Y., Marrogi, A., Graff, J.R., Baylin, S.B., and Ehrlich, M.  
642 (1998). Hypomethylation of pericentromeric DNA in breast adenocarcinomas. *Int J Cancer*  
643 *77*, 833-838.  
644 Parichy, D.M., Elizondo, M.R., Mills, M.G., Gordon, T.N., and Engeszer, R.E. (2009).  
645 Normal table of postembryonic zebrafish development: staging by externally visible  
646 anatomy of the living fish. *Dev Dyn* *238*, 2975-3015.  
647 Park, Y., and Wu, H. (2016). Differential methylation analysis for BS-seq data under  
648 general experimental design. *Bioinformatics* *32*, 1446-1453.  
649 Phillips, R.B., and Reed, K.M. (2000). Localization of repetitive DNAs to zebrafish (*Danio*  
650 *rerio*) chromosomes by fluorescence in situ hybridization (FISH). *Chromosome Res* *8*, 27-  
651 35.  
652 Qu, G.-z., Grundy, P.E., Narayan, A., and Ehrlich, M. (1999). Frequent Hypomethylation  
653 in Wilms Tumors of Pericentromeric DNA in Chromosomes 1 and 16. *Cancer Genetics*  
654 *and Cytogenetics* *109*, 34-39.  
655 Rai, K., Nadauld, L.D., Chidester, S., Manos, E.J., James, S.R., Karpf, A.R., Cairns, B.R.,  
656 and Jones, D.A. (2006). Zebra fish Dnmt1 and Suv39h1 regulate organ-specific terminal  
657 differentiation during development. *Mol Cell Biol* *26*, 7077-7085.  
658 Roulois, D., Loo Yau, H., Singhania, R., Wang, Y., Danesh, A., Shen, S.Y., Han, H., Liang,  
659 G., Jones, P.A., Pugh, T.J., *et al.* (2015). DNA-Demethylating Agents Target Colorectal  
660 Cancer Cells by Inducing Viral Mimicry by Endogenous Transcripts. *Cell* *162*, 961-973.  
661 Schneider, W.M., Chevillotte, M.D., and Rice, C.M. (2014). Interferon-stimulated genes: a  
662 complex web of host defenses. *Annu Rev Immunol* *32*, 513-545.  
663 Smith, Z.D., and Meissner, A. (2013). DNA methylation: roles in mammalian development.  
664 *Nat Rev Genet* *14*, 204-220.  
665 Stancheva, I., and Meehan, R.R. (2000). Transient depletion of xDnmt1 leads to  
666 premature gene activation in *Xenopus* embryos. *Genes Dev* *14*, 313-327.  
667 Suzuki, M.M., and Bird, A. (2008). DNA methylation landscapes: provocative insights from  
668 epigenomics. *Nat Rev Genet* *9*, 465-476.  
669 Suzuki, T., Fujii, M., and Ayusawa, D. (2002). Demethylation of classical satellite 2 and 3  
670 DNA with chromosomal instability in senescent human fibroblasts. *Exp Gerontol* *37*, 1005-  
671 1014.  
672 Tanne, A., Muniz, L.R., Puzio-Kuter, A., Leonova, K.I., Gudkov, A.V., Ting, D.T.,  
673 Monasson, R., Cocco, S., Levine, A.J., Bhardwaj, N., *et al.* (2015). Distinguishing the  
674 immunostimulatory properties of noncoding RNAs expressed in cancer cells. *Proc Natl*  
675 *Acad Sci U S A* *112*, 15154-15159.  
676 Tao, Y., Xi, S., Shan, J., Maunakea, A., Che, A., Briones, V., Lee, E.Y., Geiman, T.,  
677 Huang, J., Stephens, R., *et al.* (2011). Lsh, chromatin remodeling family member,

678 modulates genome-wide cytosine methylation patterns at nonrepeat sequences. *Proc Natl*  
679 *Acad Sci U S A* 108, 5626-5631.

680 Thijssen, P.E., Ito, Y., Grillo, G., Wang, J., Velasco, G., Nitta, H., Unoki, M., Yoshihara,  
681 M., Suyama, M., Sun, Y., *et al.* (2015). Mutations in CDCA7 and HELLS cause  
682 immunodeficiency-centromeric instability-facial anomalies syndrome. *Nat Commun* 6,  
683 7870.

684 Ting, D.T., Lipson, D., Paul, S., Brannigan, B.W., Akhavanfard, S., Coffman, E.J., Contino,  
685 G., Deshpande, V., Iafrate, A.J., Letovsky, S., *et al.* (2011). Aberrant overexpression of  
686 satellite repeats in pancreatic and other epithelial cancers. *Science* 331, 593-596.

687 Trede, N.S., David M. Langenau, David Traver, A. Thomas Look, and Zon, a.L.I. (2004).  
688 The Use of Zebrafish to Understand Immunity. *Immunity* 20, 367-379.

689 Tsuda, H., Takarabe, T., Kanai, Y., Fukutomi, T., and Hirohashi, S. (2002). Correlation of  
690 DNA hypomethylation at pericentromeric heterochromatin regions of chromosomes 16  
691 and 1 with histological features and chromosomal abnormalities of human breast  
692 carcinomas. *Am J Pathol* 161, 859-866.

693 Tuck-Muller, C.M., Narayan, A., Tsien, F., Smeets, D.F., Sawyer, J., Fiala, E.S., Sohn,  
694 O.S., and Ehrlich, M. (2000). DNA hypomethylation and unusual chromosome instability  
695 in cell lines from ICF syndrome patients. *Cytogenet Cell Genet* 89, 121-128.

696 Ueda, Y., Okano, M., Williams, C., Chen, T., Georgopoulos, K., and Li, E. (2006). Roles  
697 for Dnmt3b in mammalian development: a mouse model for the ICF syndrome.  
698 *Development* 133, 1183-1192.

699 van der Vaart, M., van Soest, J.J., Spaink, H.P., and Meijer, A.H. (2013). Functional  
700 analysis of a zebrafish myd88 mutant identifies key transcriptional components of the  
701 innate immune system. *Dis Model Mech* 6, 841-854.

702 Velasco, G., Grillo, G., Touleimat, N., Ferry, L., Ivkovic, I., Ribierre, F., Deleuze, J.F.,  
703 Chantalat, S., Picard, C., and Francastel, C. (2018). Comparative methylome analysis of  
704 ICF patients identifies heterochromatin loci that require ZBTB24, CDCA7 and HELLS for  
705 their methylated state. *Hum Mol Genet.*

706 von Bernuth, H., Ravindran, E., Du, H., Frohler, S., Strehl, K., Kramer, N., Issa-Jahns, L.,  
707 Amulic, B., Ninnemann, O., Xiao, M.S., *et al.* (2014). Combined immunodeficiency  
708 develops with age in Immunodeficiency-centromeric instability-facial anomalies syndrome  
709 2 (ICF2). *Orphanet J Rare Dis* 9, 116.

710 Weisenberger, D.J., Campan, M., Long, T.I., Kim, M., Woods, C., Fiala, E., Ehrlich, M.,  
711 and Laird, P.W. (2005). Analysis of repetitive element DNA methylation by MethyLight.  
712 *Nucleic Acids Res* 33, 6823-6836.

713 Wu, H., Thijssen, P.E., de Klerk, E., Vonk, K.K., Wang, J., den Hamer, B., Aytekin, C., van  
714 der Maarel, S.M., and Daxinger, L. (2016). Converging disease genes in ICF syndrome:  
715 ZBTB24 controls expression of CDCA7 in mammals. *Hum Mol Genet* 25, 4041-4051.

716 Xi, Y., and Li, W. (2009). BSMAP: whole genome bisulfite sequence MAPping program.  
717 *BMC Bioinformatics* 10, 232.

718 Xu, G.L., Bestor, T.H., Bourc'his, D., Hsieh, C.L., Tommerup, N., Bugge, M., Hulten, M.,  
719 Qu, X., Russo, J.J., and Viegas-Pequignot, E. (1999). Chromosome instability and  
720 immunodeficiency syndrome caused by mutations in a DNA methyltransferase gene.  
721 *Nature* 402, 187-191.

722

723

724 **Figure Legends**

725

726 **Figure 1. Mutation of *zbtb24* causes ICF syndrome-like phenotypes in zebrafish.**

727 (A) Schematic of human and zebrafish Zbtb24 proteins. The BTB/POZ domain is indicated  
728 in blue and C2H2-type zinc fingers in dark grey. (B) Schematic of zebrafish *zbtb24* gene.  
729 Location of TALEN target sequences are indicated in red (not to scale). Brackets indicate  
730 the region deleted by the *zbtb24*<sup>mk22(Δ)</sup> allele. (C) Representative images of *zbtb24*<sup>+/+</sup> and  
731 *zbtb24*<sup>Δ/Δ</sup> zebrafish at 2 wpf. Scale bar: 1 mm. (D) Standard length measurements for  
732 *zbtb24*<sup>+/+</sup> and *zbtb24*<sup>Δ/Δ</sup> zebrafish at 1, 2, 3 and 4 wpf (n≥6 for each group). (E)  
733 Representative images of *zbtb24*<sup>+/+</sup> and *zbtb24*<sup>Δ/Δ</sup> zebrafish at 5 months. Scale bar: 5 mm.  
734 (F) Average weight of *zbtb24*<sup>+/+</sup> and *zbtb24*<sup>Δ/Δ</sup> zebrafish at 5 months (n=5 for each group).  
735 (G) Representative images of facial abnormalities in *zbtb24*<sup>+/+</sup> and *zbtb24*<sup>Δ/Δ</sup> adults at 6  
736 months. Scale bar: 2 mm. (H) Schematic and quantification of facial abnormalities in  
737 *zbtb24*<sup>Δ/Δ</sup> zebrafish (n=5 for each group). (I) Abundance of *IgM*, *IgD* and *IgZ* transcripts in  
738 *zbtb24*<sup>+/+</sup> and *zbtb24*<sup>Δ/Δ</sup> zebrafish at 6 weeks post fertilization (n=5 for each group). (J)  
739 Quantification of lymphoid cell populations in total blood isolated from *zbtb24*<sup>+/+</sup> or  
740 *zbtb24*<sup>Δ/Δ</sup> kidney marrow from adults, measured by Forward/Side scatter flow cytometry  
741 (n=11 for each group). (K) Kaplan-Meier curve indicating survival among groups of  
742 *zbtb24*<sup>+/+</sup> and *zbtb24*<sup>Δ/Δ</sup> zebrafish (n=12 for each group). All error bars indicate standard  
743 error of the mean (SEM).

744 **Figure 2. Mutation of *zbtb24* causes progressive methylation loss at**  
745 **pericentromeric satellite repeats.**

746 (A) Southern blot of genomic DNA digested with 5mC-sensitive restriction enzyme  
747 HpyCH4IV and probed with zebrafish Sat1 sequence. Each lane represents DNA isolated  
748 from one adult individual of the indicated genotype. DNA from *dnmt1*<sup>-/-</sup> zebrafish larvae at  
749 7 days post fertilization and their phenotypically wild-type siblings (WT) provides a positive  
750 control. (B) Quantification of methylation changes at Sat1 sequences in panel A. Error  
751 bars indicate SEM from the 3 biological replicates. (C) Southern blot of genomic DNA  
752 digested with 5mC-sensitive restriction enzyme HpyCH4IV and probed with zebrafish Sat1  
753 sequence. Genomic DNA was isolated from *zbtb24*<sup>+/+</sup> and *zbtb24*<sup>Δ/Δ</sup> animals at 1, 2, 4, 16  
754 and 32 wpf as indicated. (D) Quantification of methylation changes at Sat1 sequences in  
755 panel C. Data represent averages from two independent experiments. Error bars

756 represent the standard deviation (SD). **(E)** Heat map of CpG methylation in *zbtb24*<sup>+/+</sup> and  
757 *zbtb24*<sup>Δ/Δ</sup> as assessed by ERRBS (Data reflects 3 biological replicates of each genotype).  
758

759 **Figure 3. Mutation of *zbtb24* leads to activation of innate immune response genes.**

760 **(A)** Volcano plot representation of differential gene expression in *zbtb24*<sup>+/+</sup> vs *zbtb24*<sup>Δ/Δ</sup>  
761 zebrafish at 2 wpf. Blue and red points mark genes with >2 fold downregulation or  
762 upregulation respectively. **(B)** RNA-seq heatmap showing innate immune genes  
763 upregulated in *zbtb24*<sup>Δ/Δ</sup> mutant compared to *zbtb24*<sup>+/+</sup> siblings. Shown are Z-score  
764 normalized gene expression values. **(C)** GSEA of a set of genes involved in Response to  
765 Virus in zebrafish comparing *zbtb24*<sup>+/+</sup> vs *zbtb24*<sup>Δ/Δ</sup>. NES, normalized enrichment score;  
766 FDR, false discovery rate. **(D)** qRT-PCR demonstrating upregulated interferon and  
767 inflammatory response genes in *zbtb24*<sup>Δ/Δ</sup> mutants at 3 wpf. Expression levels are  
768 reported relative to *β-actin*. Error bars indicate SEM from at least 3 independent biological  
769 replicates with n=8 total animals for each replicate. **(E)** qRT-PCR analysis reveals similar  
770 expression of interferon genes in *zbtb24*<sup>+/+</sup> and *zbtb24*<sup>Δ/Δ</sup> larvae at 1 wpf. Error bars  
771 represent SEM from at least 5 biological replicates.

772 **Figure 4. Interferon response in *zbtb24* mutants is mediated by sensors of cytosolic**  
773 **RNA.**

774 **(A)** Expression of interferon signaling genes *stat1b* and *irf7* in indicated genotypes at 3  
775 wpf. n = 4 biological replicates. **(B)** Expression of the ISGs *stat1b* and *irf7* in indicated  
776 genotypes at 3 wpf. n ≥ 7 biological replicates. **(C)** Expression of interferon signaling genes  
777 *stat1b* and *irf7* in indicated genotypes at 3 wpf. n ≥ 5 biological replicates. All error bars  
778 indicate SEM.

779 **Figure 5. Pericentromeric transcripts are sufficient to induce the innate immune**  
780 **response in *zbtb24* mutants.**

781 **(A)** Northern blot analysis of Sat1 transcripts in *zbtb24*<sup>+/+</sup> and *zbtb24*<sup>Δ/Δ</sup> zebrafish at 6 wpf.  
782 Each lane represents a biological replicate. The lower panel represents the cropped  
783 ethidium-bromide stained gel as loading control. **(B)** qRT-PCR for Sat1 transcripts in  
784 *zbtb24*<sup>+/+</sup> and *zbtb24*<sup>Δ/Δ</sup> zebrafish at 1, 3 and 6 wpf. Error bars indicate SEM of at least 4  
785 biological replicates in each group. **(C)** Correlation between the expression of Sat1 and  
786 *irf7* in *zbtb24*<sup>+/+</sup> and *zbtb24*<sup>Δ/Δ</sup> at 6 weeks (n=15). **(D)** TASA-TD PCR amplified sense (s)  
787 and antisense (as) transcripts Sat1 (114 bp) and *β-actin* (125bp) from first strand *zbtb24*<sup>Δ/Δ</sup>  
788 cDNA. PCR primers: gene-specific (GS); TAG. The products from TASA-TD PCR were

789 run on the same gel, then cropped and presented. This panel is representative of two  
790 independent biological replicates. (E) Quantification of TASA-TD from panel D. Error bars  
791 indicate SD from 2 biological replicates. (F) Expression of interferon stimulated genes in  
792 wild-type embryos injected with Sat1 or dsRed RNA. 50pg of in vitro transcribed sense  
793 and antisense transcripts were injected into wild-type zebrafish embryos at the 1-cell  
794 stage. Total RNA was extracted at 8 hours post fertilization for qRT-PCR analysis. Error  
795 bars indicate SEM from at least 3 biological replicates with n=20 embryos for each  
796 biological replicate.

797 **Figure 6. Mutation of cytosolic dsRNA receptor Mda5 mitigates the interferon**  
798 **response in *zbtb24*<sup>ΔΔ</sup> zebrafish.**

799 (A) Expression of interferon signaling genes *stat1b* and *irf7* in indicated genotypes at 3  
800 wpf. n ≥ 7 biological replicates. (B) RNA-seq heatmap of interferon stimulated genes  
801 upregulated in *zbtb24*<sup>ΔΔ</sup> zebrafish and rescued in *mda5*<sup>mk29/mk29</sup>; *zbtb24*<sup>ΔΔ</sup> zebrafish at 3  
802 wpf. Shown are Z-score normalized gene expression values. (C) Expression of interferon  
803 signaling genes *stat1b* and *irf7* in indicated genotypes at 6 wpf. n=6 biological replicates.  
804 (D) Model for the activation of interferon response in *zbtb24* mutants. Loss of Zbtb24  
805 function causes hypomethylation of pericentromeric Sat1 repeats, which leads to  
806 derepression of associated Sat1 transcripts. These pericentromeric transcripts are  
807 recognized by the dsRNA helicase Mda5 which signals through Mavs and Irf7 to  
808 upregulate ISGs. Autoregulatory feedback implicates *irf7* as both an ISG and a key  
809 downstream effector of Mda5/Mavs signaling.

810 **Figure 1-figure supplement 1. Zbtb24 conservation in vertebrate species.**

811 (A) Sequence alignment of mouse (Mm), human (Hs) and zebrafish (Dr) Zbtb24 showing  
812 conservation of BTB (blue) and Zinc finger (orange) domains. (B) Phylogenetic tree of  
813 Zbtb24 with closest members of Zbtb family of proteins, Zbtb14 and Zbtb16 mouse, rat,  
814 human, chick, and Tetradon. Alignments were performed on full-length amino acid  
815 sequences via ClustalW and DRAWTREE (<http://mobyli.pasteur.fr/cgi-bin/portal.py>).

816 **Figure 1-figure supplement 2. TALEN design for introducing mutations at the**  
817 **endogenous *zbtb24* zebrafish gene.**

818 (A) Schematic of TALEN sequences showing target sites for introducing mutations in  
819 *zbtb24*. P1, P2 and P3 indicate locations for genotyping primers. Sequence in blue  
820 indicate target site. Sequence in yellow indicates site of restriction enzyme digestion. (B)

821 Sequence trace confirming generation of large deletion, *zbtb24*<sup>mk22( $\Delta$ )</sup>. (C) Representative  
822 genotyping of *zbtb24*<sup>mk22( $\Delta$ )</sup> allele. L: Ladder. P1, P2, P3 represent primers from panel A  
823 used for amplifying product in specified lane. (D) qRT-PCR analysis of *zbtb24* mRNA in  
824 *zbtb24*<sup>+/+</sup> and *zbtb24* <sup>$\Delta/\Delta$</sup>  zebrafish at 2 wpf (n=6 for each group).

825 **Figure 1-figure supplement 3. A second mutant allele of *zbtb24* recapitulates key**  
826 **features of ICF Syndrome.**

827 (A) Schematic of *zbtb24*<sup>mk19</sup> with premature stop codon at aa 82. (B) Representative  
828 genotyping of *zbtb24*<sup>mk19</sup> allele. (C) Sequence trace confirming generation of small  
829 deletion allele, *zbtb24*<sup>mk19</sup>. (D) Representative bright field image of *zbtb24*<sup>+/+</sup> and  
830 *zbtb24*<sup>mk19/mk19</sup> zebrafish at 4 days and 2 months after fertilization. Scale bar: 1mm. (E)  
831 Quantification of body weight of *zbtb24*<sup>+/+</sup> and *zbtb24*<sup>mk19/mk19</sup> zebrafish at 5 months (n  $\geq$  6  
832 biological replicates). (F) Facial abnormalities in *zbtb24*<sup>+/+</sup> and *zbtb24*<sup>mk19/mk19</sup> zebrafish.  
833 Scale bar: 3 mm. (G) qRT-PCR analysis of IgM, IgD and IgZ zebrafish immunoglobulins  
834 in *zbtb24*<sup>+/+</sup> and *zbtb24*<sup>mk19/mk19</sup> zebrafish measured at 6 weeks post fertilization (n=5  
835 biological replicates). (H) Quantification of lymphoid cell populations in total blood isolated  
836 from *zbtb24*<sup>+/+</sup> and *zbtb24*<sup>mk19/mk19</sup> adult kidney marrow, measured by Forward/Side scatter  
837 flow cytometry (n=16 biological replicates). All error bars indicate standard error of the  
838 mean (SEM).

839 **Figure 2-figure supplement 1. *Zbtb24* mutation causes methylation loss at**  
840 **pericentromeric repeats.**

841 (A) Southern blot of genomic DNA digested with 5mC-sensitive restriction enzyme  
842 HpyCH4IV and probed with zebrafish Sat1 sequence. Genomic DNA was isolated at 1  
843 month from *zbtb24*<sup>+/+</sup> and *zbtb24*<sup>mk19/mk19</sup> animals. Each lane represents one biological  
844 replicate for the indicated genotype. (B) Southern blot of genomic DNA from different  
845 tissues in *zbtb24*<sup>+/+</sup> and *zbtb24* <sup>$\Delta/\Delta$</sup>  digested with 5mC-sensitive restriction enzyme  
846 HpyCH4IV and probed with zebrafish Sat1 sequence. Each lane represents pooled DNA  
847 samples of the indicated tissue from 3 zebrafish adults.

848 **Figure 2-figure supplement 2. *Zbtb24* mutants exhibit modest reductions in 5mC at**  
849 **non-pericentromeric sequences**

850 (A-B) Southern Blot and quantification of HpyCH4IV digestion at Sat1 sequences in fin  
851 tissues used for ERRBS. (C) Basic statistics of ERRBS analysis in *zbtb24*<sup>+/+</sup> and *zbtb24* <sup>$\Delta/\Delta$</sup>   
852 zebrafish. (D) Venn diagram summarizing the overlap between differentially upregulated

853 genes from RNA-Seq (right circle) and genes within 100kb of all DMRs in ERRBS tested  
854 for differential expression (left circle).

855 **Figure 2-figure supplement 3. Methylation at interspersed repeats is unaffected in**  
856 ***zbtb24* mutants.**

857 Southern blot analysis of DNA methylation at interspersed repeats **(A)** Short Interspersed  
858 Nuclear Element (SINE), DANA and SINE\_HE1 **(B)** Long Interspersed Nuclear Element  
859 (LINE), L1-10 **(C)** DNA Transposon, Kolobok **(D)** Endogenous Retroviral (ERV) elements,  
860 ZFERV2, ERV1-3, ERV4 and Gypsy21 in *zbtb24*<sup>+/+</sup> and *zbtb24*<sup>Δ/Δ</sup> 1-month old zebrafish.  
861 Each lane represents a biological replicate of the indicated genotype. Genomic DNA from  
862 *dnmt1*<sup>-/-</sup> embryos is used as a positive control. The methylation-sensitive enzyme used to  
863 digest genomic DNA is indicated below the respective blot.

864 **Figure 3-figure supplement 1. Mutation in *zbtb24* leads to activation of innate**  
865 **immune response pathways.**

866 **(A)** qRT-PCR validation of genes that are part of the innate immune response pathway  
867 that are also upregulated in *zbtb24*<sup>mk19/mk19</sup> zebrafish at 3 wpf. Error bars indicate SEM  
868 from 5 biological replicates.

869 **Figure 4-figure supplement 1. Mutation of zebrafish orthologs of *mavs*, *sting*, and**  
870 ***mda5*.**

871 **(A)** Schematic of mutation in *mavs* including position of targeted gRNA, sequence  
872 information of the mutation, and location of predicted STOP codon. **(B)** Schematic of  
873 mutation in *sting* including position of targeted gRNA, sequence information of the  
874 mutation, and location of predicted STOP codon. **(C)** Schematic of mutation in *mda5*  
875 including position of targeted gRNA, sequence information of the mutation, and location  
876 of predicted STOP codon. The site of deletion is indicated with a red arrow on the  
877 sequence trace.

878 **Figure 5-figure supplement 1. Mutation in *zbtb24* upregulates *Sat1* transcripts but**  
879 **not transposons.**

880 **(A)** qRT-PCR of *Sat1* RNA in *zbtb24*<sup>+/+</sup> and *zbtb24*<sup>mk19/mk19</sup> zebrafish at 6 wpf. Error bars  
881 indicate SEM from at least 3 biological replicates. **(B)** qRT-PCR reveals similar levels of  
882 expression from transposable elements in *zbtb24*<sup>+/+</sup> and *zbtb24*<sup>Δ/Δ</sup> zebrafish at 6 wpf. Error  
883 bars indicate SEM from 4-8 biological replicates.

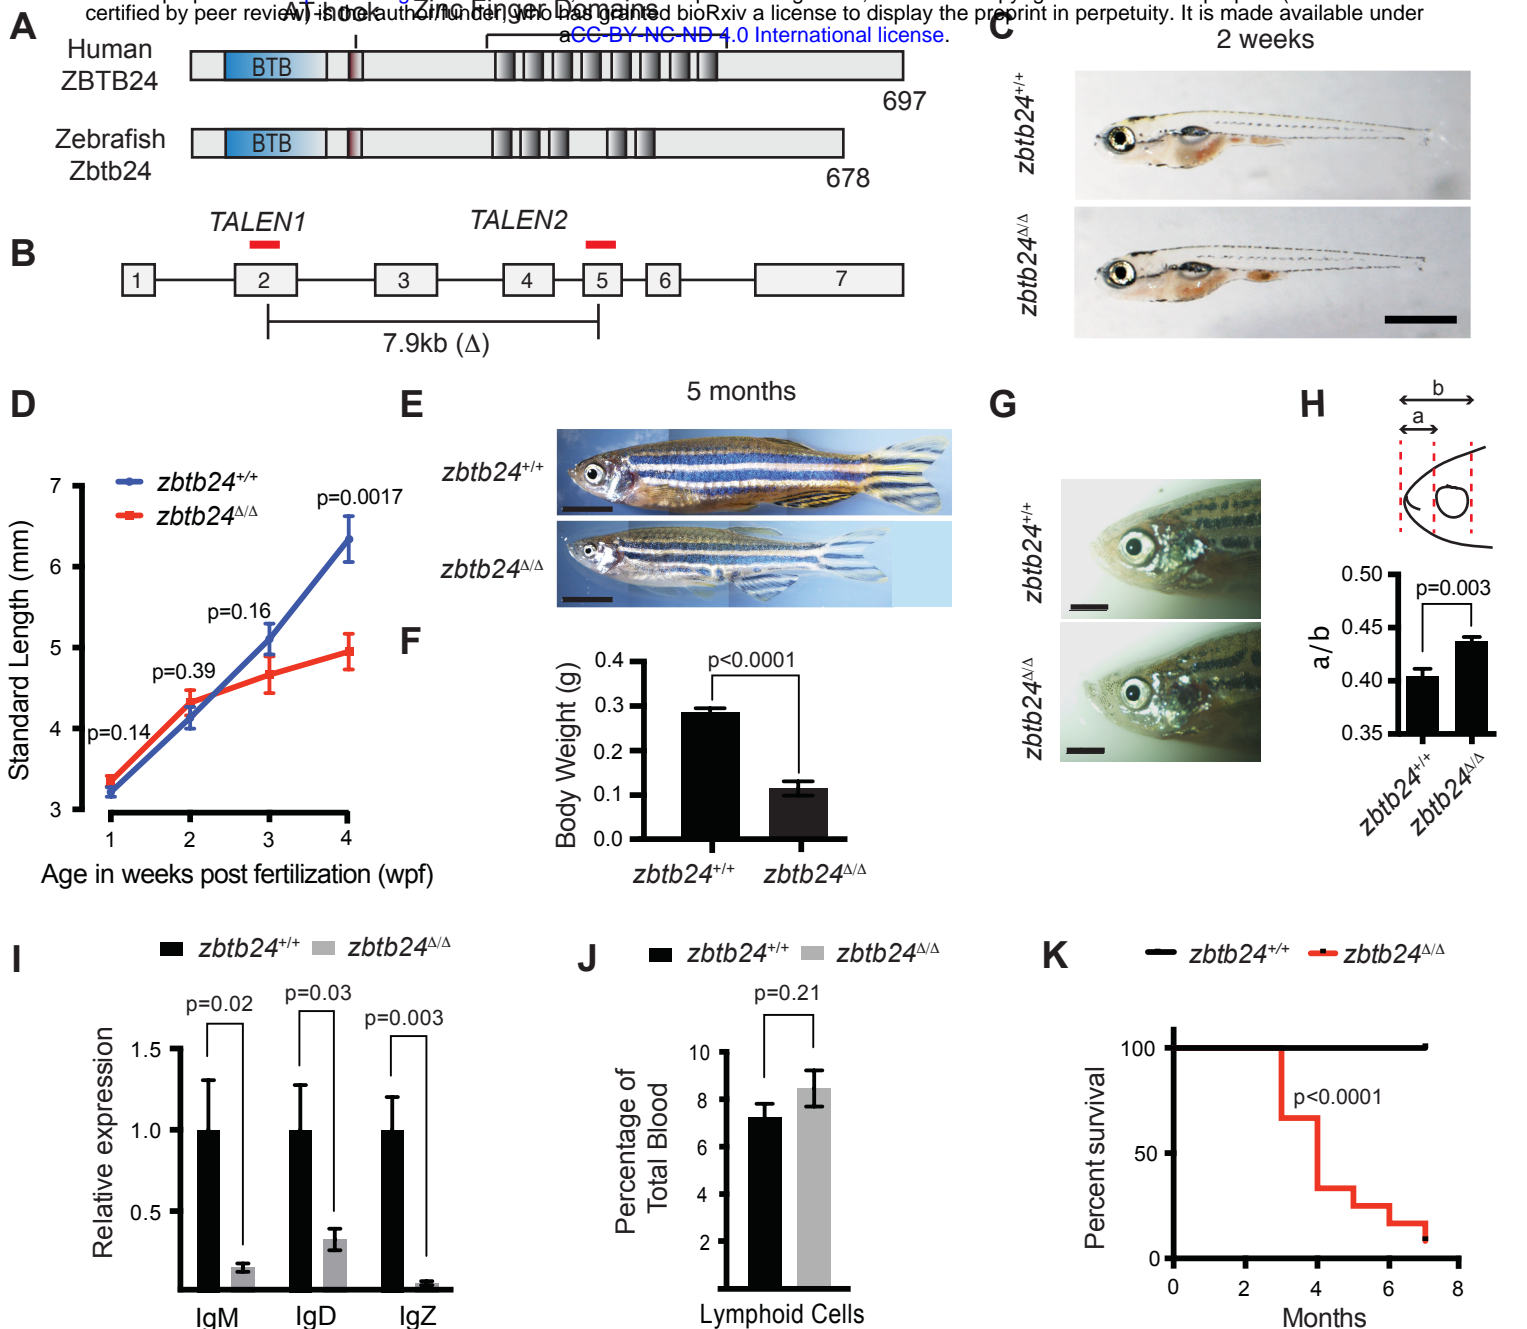

**Figure 1. Mutation of *zbtb24* causes ICF syndrome-like phenotypes in zebrafish.**

(A) Schematic of human and zebrafish Zbtb24 proteins. The BTB/POZ domain is indicated in blue and C2H2-type zinc fingers in dark grey. (B) Schematic of zebrafish *zbtb24* gene. Location of TALEN target sequences are indicated in red (not to scale). Brackets indicate the region deleted by the *zbtb24*<sup>mk22(Δ)</sup> allele. (C) Representative images of *zbtb24*<sup>+/+</sup> and *zbtb24*<sup>Δ/Δ</sup> zebrafish at 2 wpf. Scale bar: 1 mm. (D) Standard length measurements for *zbtb24*<sup>+/+</sup> and *zbtb24*<sup>Δ/Δ</sup> zebrafish at 1, 2, 3 and 4 wpf (n≥6 for each group). (E) Representative images of *zbtb24*<sup>+/+</sup> and *zbtb24*<sup>Δ/Δ</sup> zebrafish at 5 months. Scale bar: 5 mm. (F) Average weight of *zbtb24*<sup>+/+</sup> and *zbtb24*<sup>Δ/Δ</sup> zebrafish at 5 months (n=5 for each group). (G) Representative images of facial abnormalities in *zbtb24*<sup>+/+</sup> and *zbtb24*<sup>Δ/Δ</sup> adults at 6 months. Scale bar: 2 mm. (H) Schematic and quantification of facial abnormalities in *zbtb24*<sup>Δ/Δ</sup> zebrafish (n=5 for each group). (I) Abundance of *IgM*, *IgD* and *IgZ* transcripts in *zbtb24*<sup>+/+</sup> and *zbtb24*<sup>Δ/Δ</sup> zebrafish at 6 weeks post fertilization (n=5 for each group). (J) Quantification of lymphoid cell populations in total blood isolated from *zbtb24*<sup>+/+</sup> or *zbtb24*<sup>Δ/Δ</sup> kidney marrow from adults, measured by Forward/Side scatter flow cytometry (n=11 for each group). (K) Kaplan-Meier curve indicating survival among groups of *zbtb24*<sup>+/+</sup> and *zbtb24*<sup>Δ/Δ</sup> zebrafish (n=12 for each group). All error bars indicate standard error of the mean (SEM).



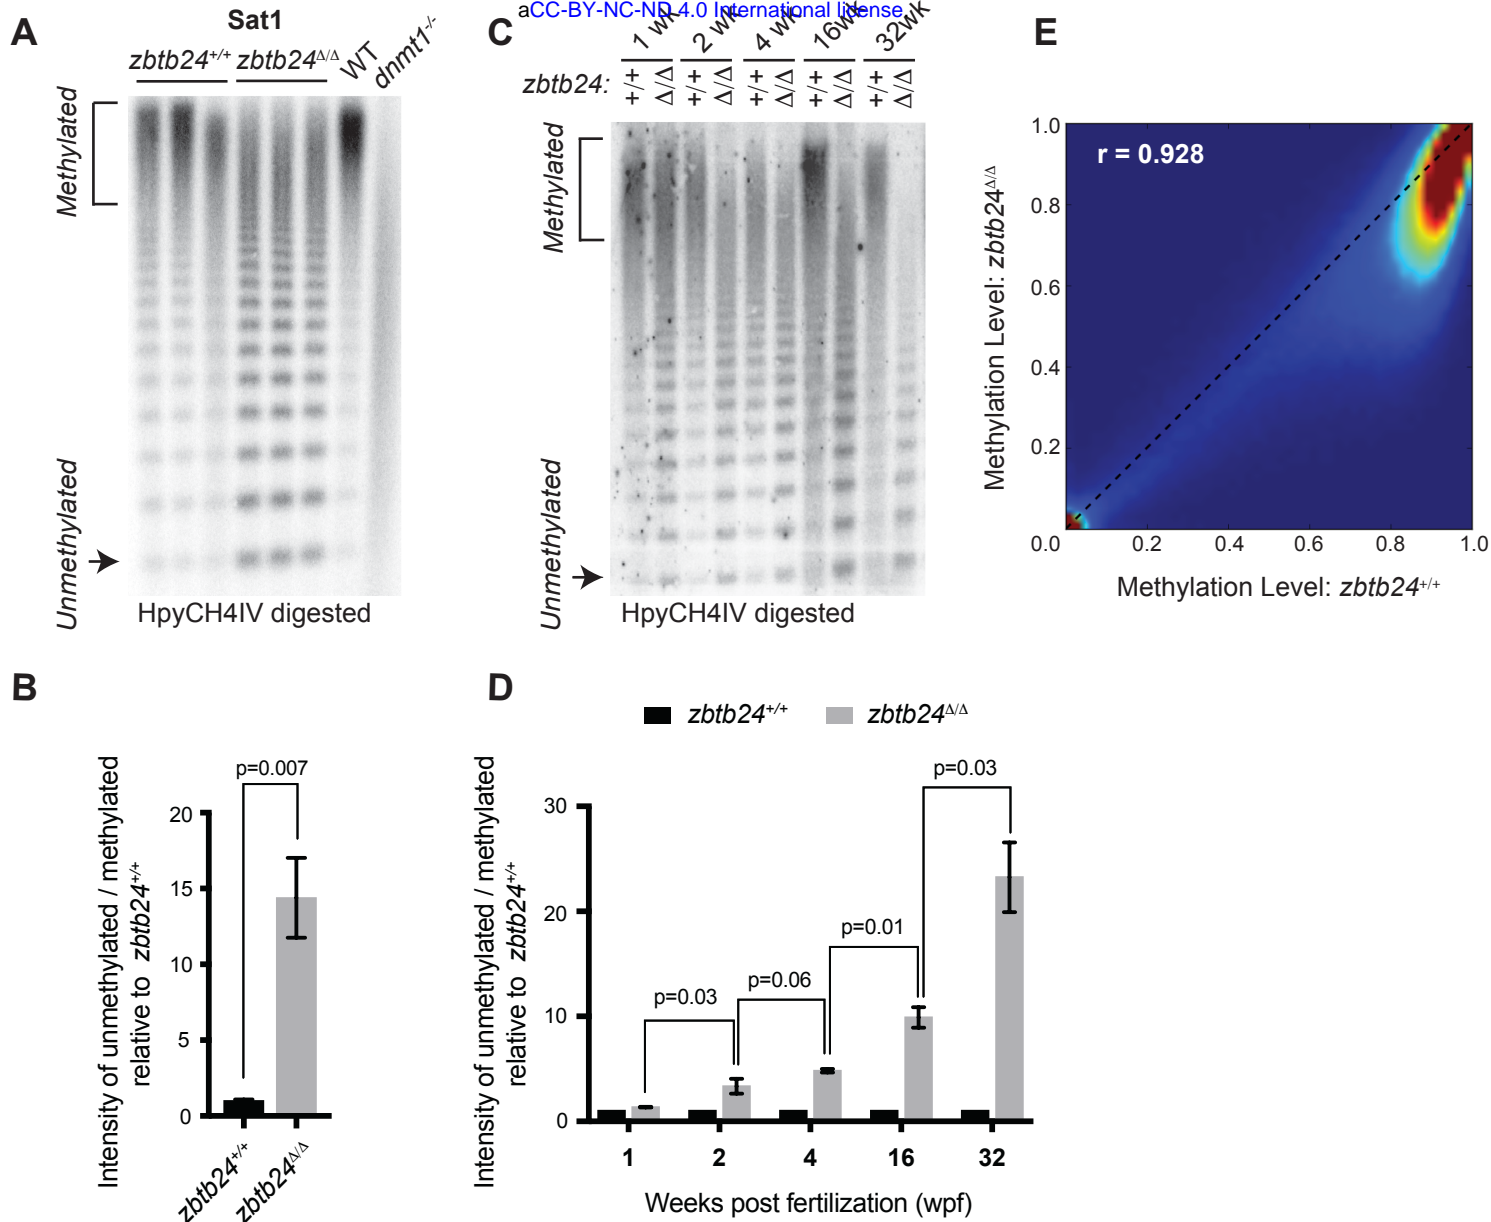

**Figure 2. Mutation of *zbtb24* causes progressive methylation loss at pericentromeric satellite repeats.**

(A) Southern blot of genomic DNA digested with 5mC-sensitive restriction enzyme HpyCH4IV and probed with zebrafish Sat1 sequence. Each lane represents DNA isolated from one adult individual of the indicated genotype. DNA from *dnmt1*<sup>-/-</sup> zebrafish larvae at 7 days post fertilization and their phenotypically wild-type siblings (WT) provides a positive control. (B) Quantification of methylation changes in panel A. Error bars indicate SEM from the 3 biological replicates. (C) Southern blot of genomic DNA digested with 5mC-sensitive restriction enzyme HpyCH4IV and probed with zebrafish Sat1 sequence. Genomic DNA was isolated from *zbtb24*<sup>+/+</sup> and *zbtb24*<sup>Δ/Δ</sup> animals at 1, 2, 4, 16 and 32 wpf as indicated. (D) Quantification of methylation changes at Sat1 sequences in panel C. Data represent averages from two independent experiments. Error bars represent the standard deviation (SD). (E) Heat map of CpG methylation in *zbtb24*<sup>+/+</sup> and *zbtb24*<sup>Δ/Δ</sup> as assessed by ERRBS (Data reflects 3 biological replicates of each genotype).

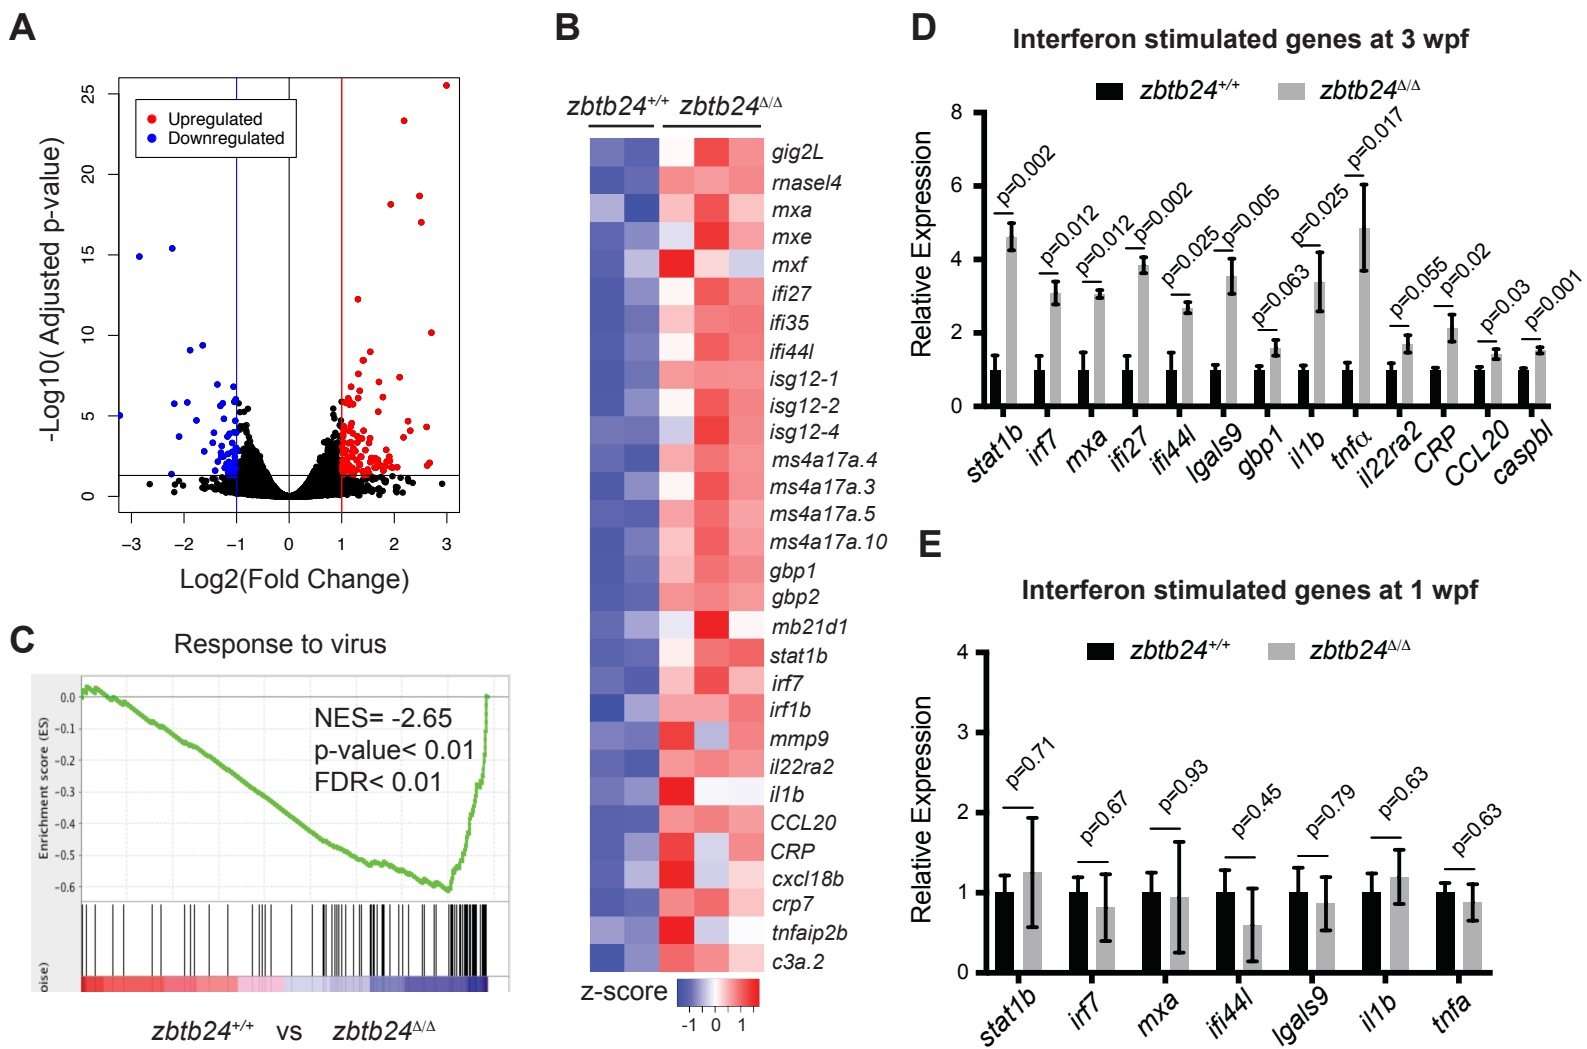

**Figure 3. Mutation of *zbtb24* leads to activation of innate immune response genes.**

(A) Volcano plot representation of differential gene expression in *zbtb24*<sup>+/+</sup> and *zbtb24*<sup>Δ/Δ</sup> zebrafish at 2 wpf. Blue and red points mark genes with >2 fold downregulation or upregulation respectively. (B) RNA-seq heatmap showing innate immune genes upregulated in *zbtb24*<sup>Δ/Δ</sup> mutant compared to *zbtb24*<sup>+/+</sup> siblings. Shown are Z-score normalized gene expression values. (C) GSEA of a set of genes involved in Response to Virus in zebrafish comparing *zbtb24*<sup>+/+</sup> vs *zbtb24*<sup>Δ/Δ</sup>. NES, normalized enrichment score; FDR, false discovery rate. (D) qRT-PCR demonstrating upregulated interferon and inflammatory response genes in *zbtb24*<sup>Δ/Δ</sup> mutants at 3 wpf. Expression levels are reported relative to β-actin. Error bars indicate SEM from at least 3 independent biological replicates with n=8 total animals for each replicate. (E) qRT-PCR analysis reveals similar expression of interferon genes in *zbtb24*<sup>+/+</sup> and *zbtb24*<sup>Δ/Δ</sup> larvae at 1 wpf. Error bars represent SEM from at least 5 biological replicates.

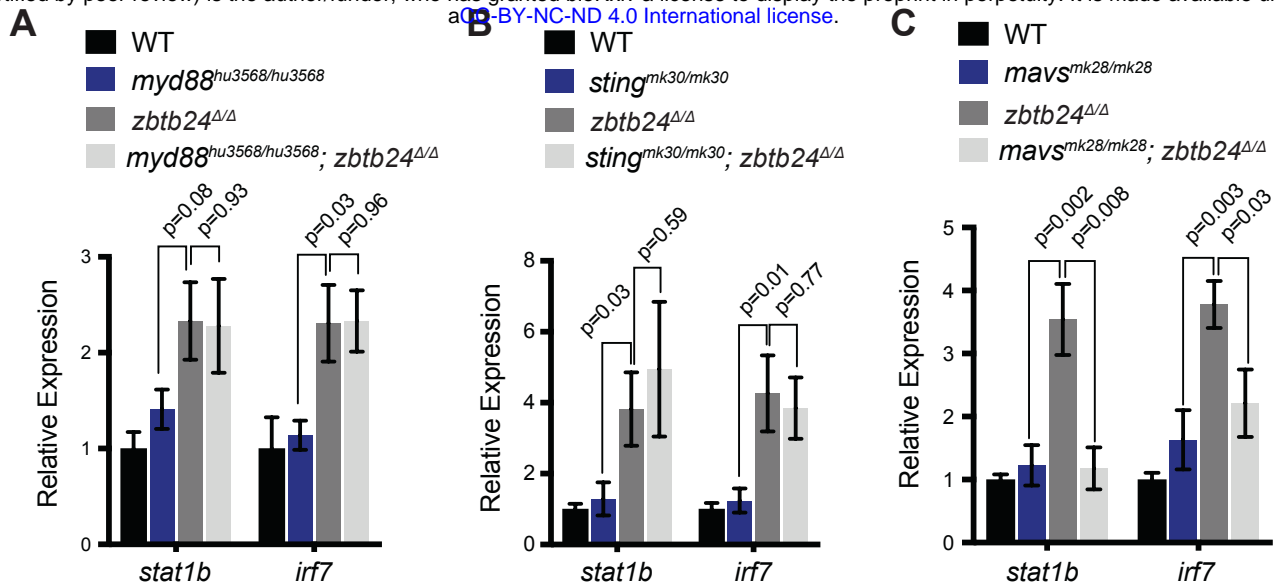

**Figure 4. Interferon response in *zbtb24* mutants is mediated by sensors of cytosolic RNA.**

(A) Expression of interferon signaling genes *stat1b* and *irf7* in indicated genotypes at 3 wpf. n = 4 biological replicates. (B) Expression of the ISGs *stat1b* and *irf7* in indicated genotypes at 3 wpf. n ≥ 7 biological replicates. (C) Expression of interferon signaling genes *stat1b* and *irf7* in indicated genotypes at 3wpf. n ≥ 5 biological replicates. All error bars indicate SEM.

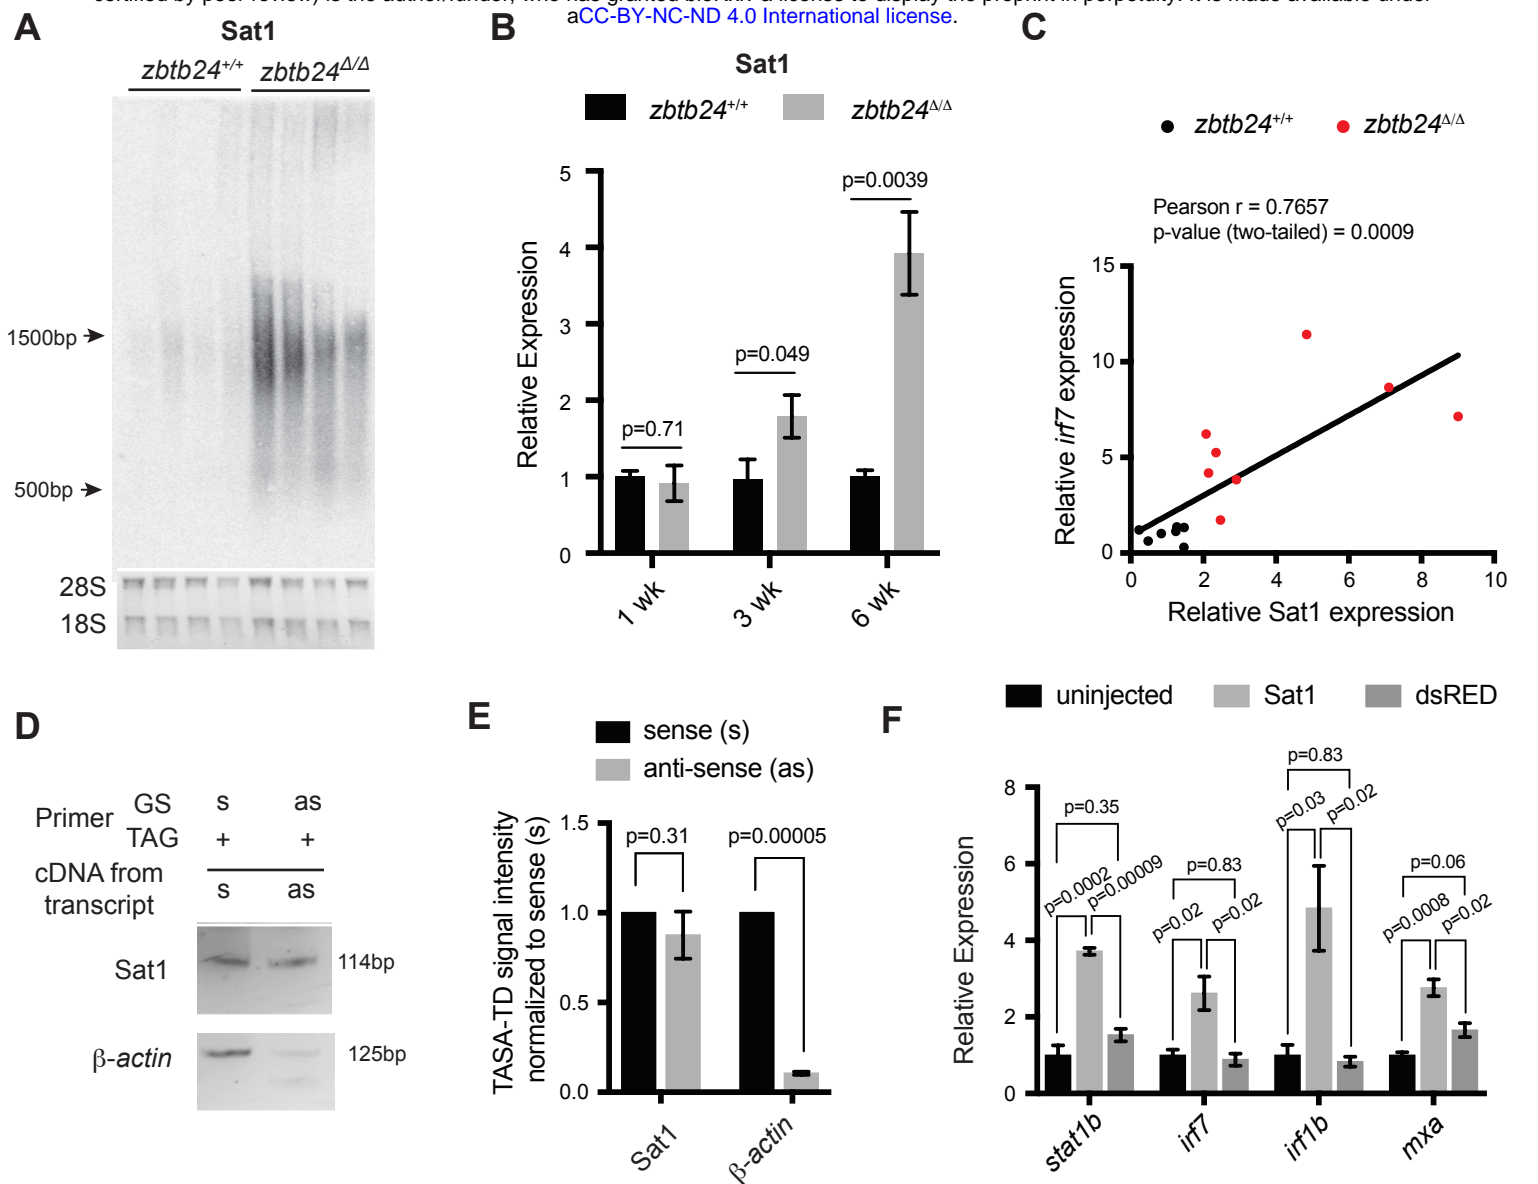

**Figure 5. Pericentromeric transcripts are sufficient to induce the innate immune response in *zbtb24* mutants.**

(A) Northern blot analysis of Sat1 transcripts in *zbtb24*<sup>+/+</sup> and *zbtb24*<sup>Δ/Δ</sup> zebrafish at 6 wpf. Each lane represents a biological replicate. The lower panel represents the cropped ethidium-bromide stained gel as loading control. (B) qRT-PCR for Sat1 transcripts in *zbtb24*<sup>+/+</sup> and *zbtb24*<sup>Δ/Δ</sup> zebrafish at 1, 3 and 6 wpf. Error bars indicate SEM of at least 4 biological replicates in each group. (C) Correlation between the expression of Sat1 and *irf7* in *zbtb24*<sup>+/+</sup> and *zbtb24*<sup>Δ/Δ</sup> at 6 weeks (n=15). (D) TASA-TD PCR amplified sense (s) and antisense (as) transcripts Sat1 (114 bp) and β-actin (125bp) from first strand *zbtb24*<sup>Δ/Δ</sup> cDNA. PCR primers: gene-specific (GS); TAG. The products from TASA-TD PCR were run on the same gel, then cropped and presented. (E) Quantification of TASA-TD from panel D. Error bars indicate SD from 2 biological replicates. (F) Expression of interferon stimulated genes *stat1b*, *irf7*, *irf1b* and *mxr* in wildtype embryos injected with Sat1 or dsRed RNA. 50pg of *in vitro* transcribed sense and antisense transcripts were injected into wildtype zebrafish embryos at the 1-cell stage. Total RNA was extracted at 8 hours post fertilization for qRT-PCR analysis. Error bars indicate SEM from at least 3 biological replicates with n=20 embryos for each biological replicate.

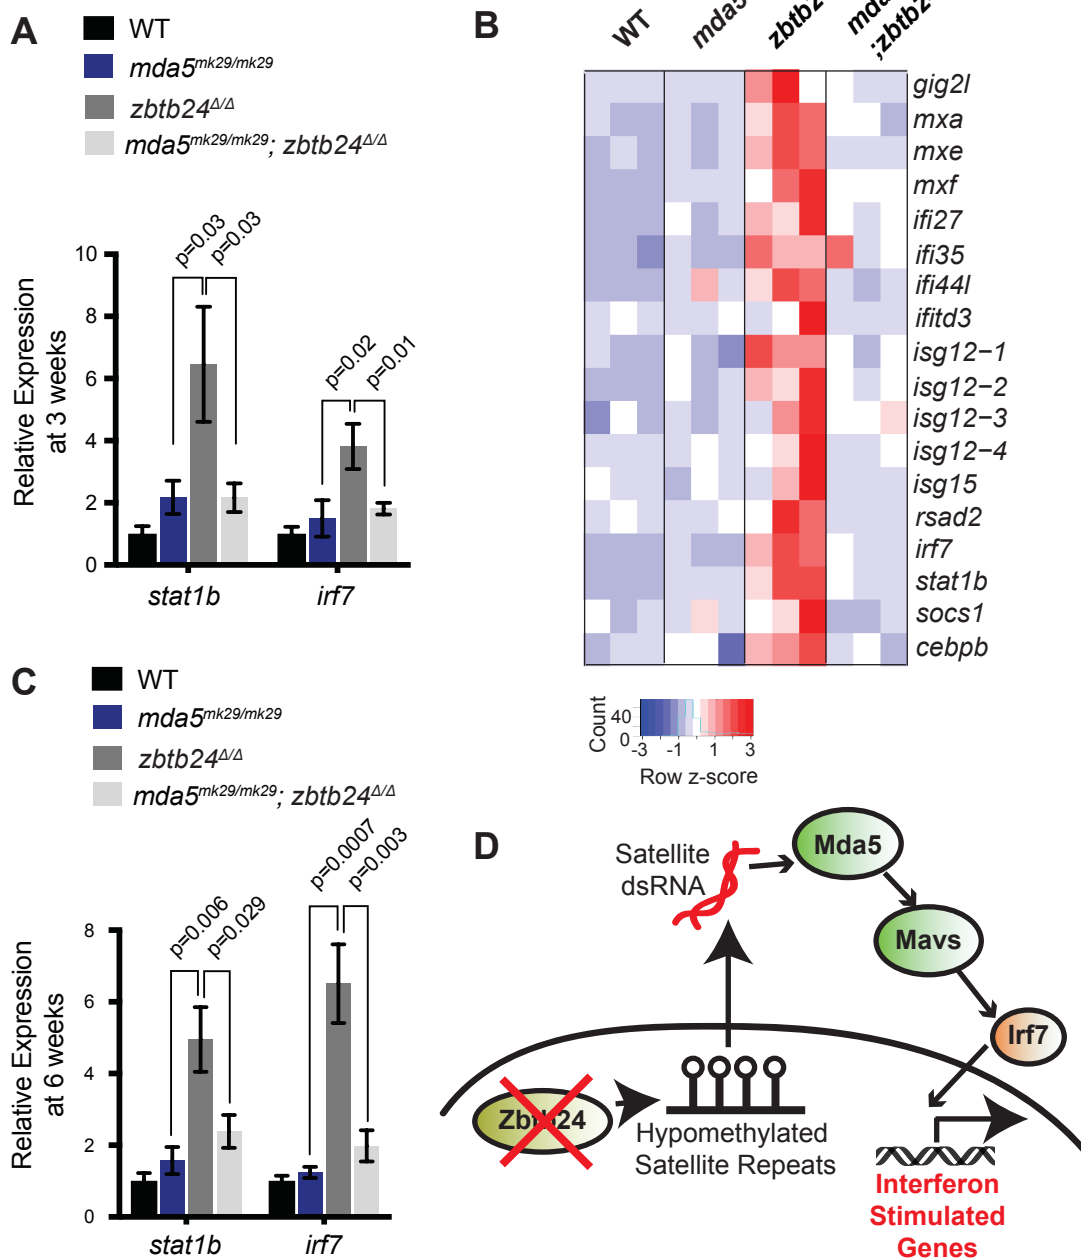

**Figure 6. Mutation of cytosolic dsRNA receptor Mda5 mitigates the interferon response in *zbtb24<sup>Δ/Δ</sup>* zebrafish.**

(A) Expression of interferon signaling genes *stat1b* and *irf7* in indicated genotypes at 3 wpf.  $n \geq 7$  biological replicates. (B) RNA-seq heatmap of interferon stimulated genes upregulated in *zbtb24<sup>Δ/Δ</sup>* zebrafish and rescued in *mda5<sup>mk29/mk29</sup>; zbtb24<sup>Δ/Δ</sup>* zebrafish at 3 wpf. Shown are Z-score normalized gene expression values. (C) Expression of interferon signaling genes *stat1b* and *irf7* in indicated genotypes at 6 wpf.  $n=6$  biological replicates. (D) Model for the activation of interferon response in *zbtb24* mutants. Loss of Zbtb24 function causes hypomethylation of pericentromeric Sat1 repeats, which leads to depression of associated Sat1 transcripts. These pericentromeric transcripts are recognized by the dsRNA helicase Mda5 which signals through Mavs and Irf7 to upregulate ISGs. Auto-regulatory feedback implicates *irf7* as both an ISG and a key downstream effector of Mda5/Mavs signaling.

**Mm\_zbtb24** MADTTPELCTGQLMVISDTTSDTVLASELDQKQKFLCDDITLIVENVHFRAHKALLAAS  
**Hs\_zbtb24** MAETSPEPS--GQLVVHSDAHSDTVLASFEDQRKKGFLCDDITLIVENVHFRAHKALLAAS  
**Dr\_zbtb24** MSALPPSSSPAVLALHSAATHKDTLHKFDTLRRSELLCDITLIVENVHFRAHKALLAAS  
  
**Mm\_zbtb24** SEYFSMMFAEEGEIGQS1YMLEGMVADTFGLLEFIYTGYLHAS EKSTEQILLATAQFLKV  
**Hs\_zbtb24** SEYFSMMFAEEGEIGQS1YMLEGMVADTFGLLEFIYTGYLHAS EKSTEQILLATAQFLKV  
**Dr\_zbtb24** SEYFSALFTAEEQVSSQLYKLDGMTANTFSSVLEFMYSAVVLVDESSSEQLMEMARFLVI  
  
**Mm\_zbtb24** YDLVKA YADFQDNHSAKPPALNCTGTPTVVVINSKKNPPLKRRKGRPRKANGLQEFGRSEL  
**Hs\_zbtb24** YDLVKA YTDFQNNHSSPKPTTLNLTAGAPVVVINSKKNPPLKRRKGRPKKVNLTQEFKSEL  
**Dr\_zbtb24** PDLIKAHEDLQ-----AVDEHMQVKRRKGRPKKNQDLSQKEN--  
  
**Mm\_zbtb24** AAEGELQLRVNNSVQNRQNFVFKEDSVKLS EQTPEDKE-SEPAGEPGSVELVPAEKDEN  
**Hs\_zbtb24** AAEEELQLRVNNSVQNRQNFVVKGDSGLNEQIAAKEKEES EPTCEPSREEEMPVEKDEN  
**Dr\_zbtb24** -PES ELQAQTSSEIQEVN-----EEPAS PATDGS-----DGE  
  
**Mm\_zbtb24** FDPKAGDQGESQSRCSRRI RRSVKLKDYKLLGDDEDDQSTAKRLCGRRKRS SGPPEARCKD  
**Hs\_zbtb24** YDPKTEDGQASQSRYSKRR IWRSVKLDKYKLVGDQEDHGS AKRICGRRKRPGGPEARCKD  
**Dr\_zbtb24** FNPREE----RRREGKRIKQPIRLKGFMRDDLMFGKEPGR--GRRRKYPTDFEARCEE  
  
**Mm\_zbtb24** CDRVFKYSHFLAIHQRRHTGERPFKCNCEGKGFAQKHSLOVHTRMHTGERPYCTCTVCGKA  
**Hs\_zbtb24** CGKVFKYNHFLAIHQRSHTGERPFKCNCEGKGFAQKHSLOVHTRMHTGERPYCTCTVCSKA  
**Dr\_zbtb24** CGKVFKSHLFLKIHQRHTGEEKFRCSVCGKEFTQKHTLLVHQRMHTGEPYICTCTVCSKA  
  
**Mm\_zbtb24** LTTKHS LLEHMSLHSGOKSFTCDQCGKYFSQKRLKSHYRVHTGHS LPECSHCHRKFMVDV  
**Hs\_zbtb24** LTTKHS LLEHMSLHSGOKSFTCDQCGKYFSQNRQLKSHYRVHTGHS LPECKDCHRKFMVDV  
**Dr\_zbtb24** LSTKHS LLEHMNLHTENKLF TCEE CGKSF SQQRQLKSHNRVHTGKGLPECAECHHKFMDA  
  
**Mm\_zbtb24** SQLKHHLRHTTGEKPF TCEICGKSF T AKSS LQTHIRIHRGEKPYSCSICGKCFSDSSAKR  
**Hs\_zbtb24** SQLKHHLRHTTGEKPF TCEICGKSF T AKSS LQTHIRIHRGEKPYSCGICGKSFSDSSAKR  
**Dr\_zbtb24** AQLKHHLRHTTGEKPF TCEICGKSF T AKSS LQTHIRIHRGEKPYCKVCDKTFSDPSARR  
  
**Mm\_zbtb24** RHCILHTGKKPFSCPEGLQFARLDNLKAHLKIHS KEKHTADSSVSGS-----  
**Hs\_zbtb24** RHCILHTGKKPFSCPECNLQFARLDNLKAHLKIHS KEKHASDASSVSGSS-----  
**Dr\_zbtb24** RHEVSHHTGKKTFSCSICKV SFARKDNLKAH IKT HNKENPPAQAES TDKPPQSAPEQQEQE  
  
**Mm\_zbtb24** -----NVDEGRNIIQLQPYQLSTSGEQEIQLLVTD SVHNINFMGPSSQGVSVVAEAS  
**Hs\_zbtb24** -----NTEEVRNIIQLQPYQLSTSGEQEIQLLVTD SVHNINFMGPSSQGVSVVTAES  
**Dr\_zbtb24** QQQQQQTSGDKELHSILQLQPFQLPAHQEQEIQLLVTDG----ENLSLDQEQSISITSE-  
  
**Mm\_zbtb24** PQSMA TDPAANI TLLTQPEQLQGLILLSAQEQEAHEIQSLSVIGGQMESSTQEPVHVITL  
**Hs\_zbtb24** SQNMTADQAANL TLLTQPEQLQNLILLSAQEQEHEIQSLNMIES QMGPSQTEPVHVITL  
**Dr\_zbtb24** -----DTEQSLALLTQPSGHVQNLAVVTP-DGNAQIQTISV LGGV E VNGGDPQMHVITL  
  
**Mm\_zbtb24** SKETLEHLHAHQEQTTSSVPAADTGARATPVPS-----TRPGAELTQAPLAVPLDPS  
**Hs\_zbtb24** SKETLEHLHAHQEQTEELHLATSTSDPAQHL-----QLTQEP-----GPPP  
**Dr\_zbtb24** SKEAMEQLQVHHGAPQQLQVIHQLS EEQTGPVAGIHISGQSGQAISISQTTEQIPSDQIQ  
  
**Mm\_zbtb24** GATVAGWPFPGPSYRSLKML-----  
**Hs\_zbtb24** PTHHV PQTPLGQEQS-----  
**Dr\_zbtb24** GQTFQIQAGTVSYLYTTSMNPNQ

Zinc Finger Domains

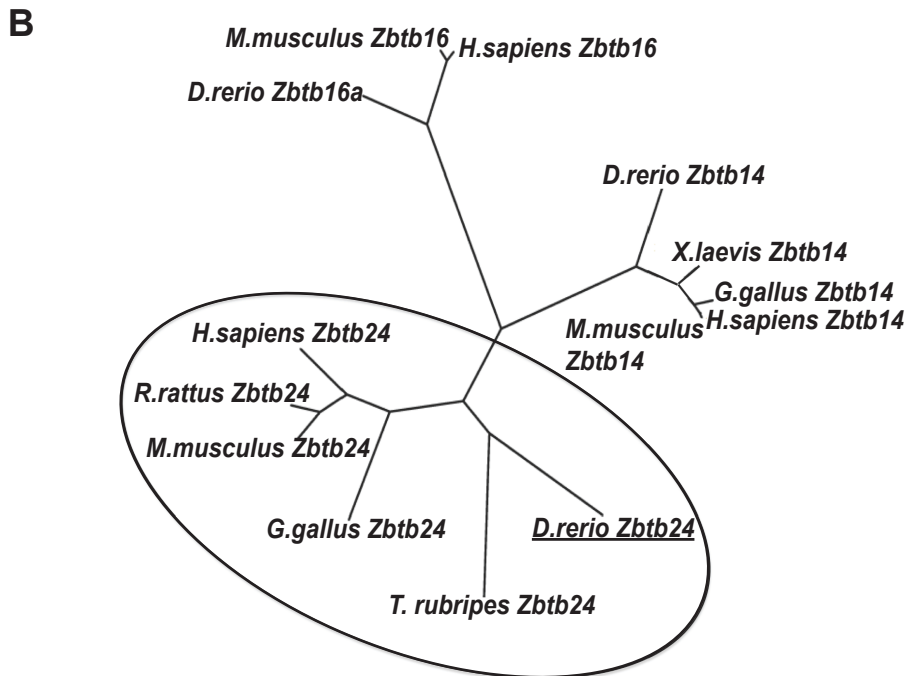

**Figure 1-figure supplement 1. Zbtb24 conservation in vertebrate species.**

(A) Sequence alignment of mouse (Mm), human (Hs) and zebrafish (Dr) Zbtb24 showing conservation of BTB (blue) and Zinc finger (orange) domains. (B) Phylogenetic tree of Zbtb24 with closest members of Zbtb family of proteins, Zbtb14 and Zbtb16 mouse, rat, human, chick, and Tetradon. Alignments were performed on full-length amino acid sequences via ClustalW and DRAWTREE (<http://mobyle.pasteur.fr/cgi-bin/portal.py>).

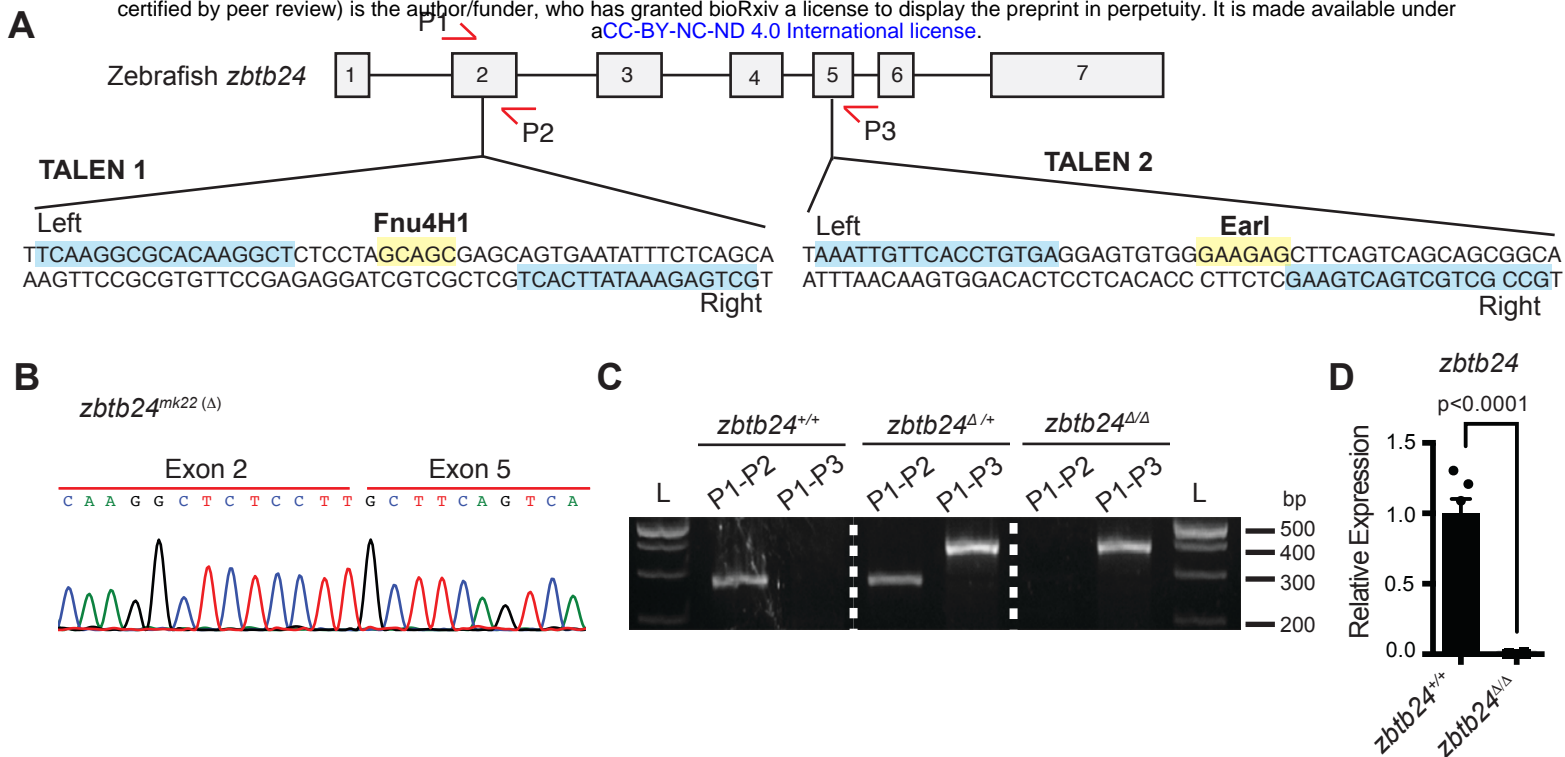

**Figure 1-figure supplement 2. TALEN design for introducing mutations at the endogenous *zbtb24* zebrafish gene.**

(A) Schematic of TALEN sequences showing target sites for introducing mutations in *zbtb24*. P1, P2 and P3 indicate locations for genotyping primers. Sequence in blue indicate target site. Sequence in yellow indicates site of restriction enzyme digestion.

(B) Sequence trace confirming generation of large deletion, *zbtb24*<sup>mk22(Δ)</sup>. (C) Representative genotyping of *zbtb24*<sup>mk22(Δ)</sup> allele. L: Ladder. P1, P2, P3 represent primers from panel A used for amplifying product in specified lane. (D) qRT-PCR analysis of *zbtb24* mRNA in *zbtb24*<sup>+/+</sup> and *zbtb24*<sup>Δ/Δ</sup> zebrafish at 2 wpf (n=6 for each group).

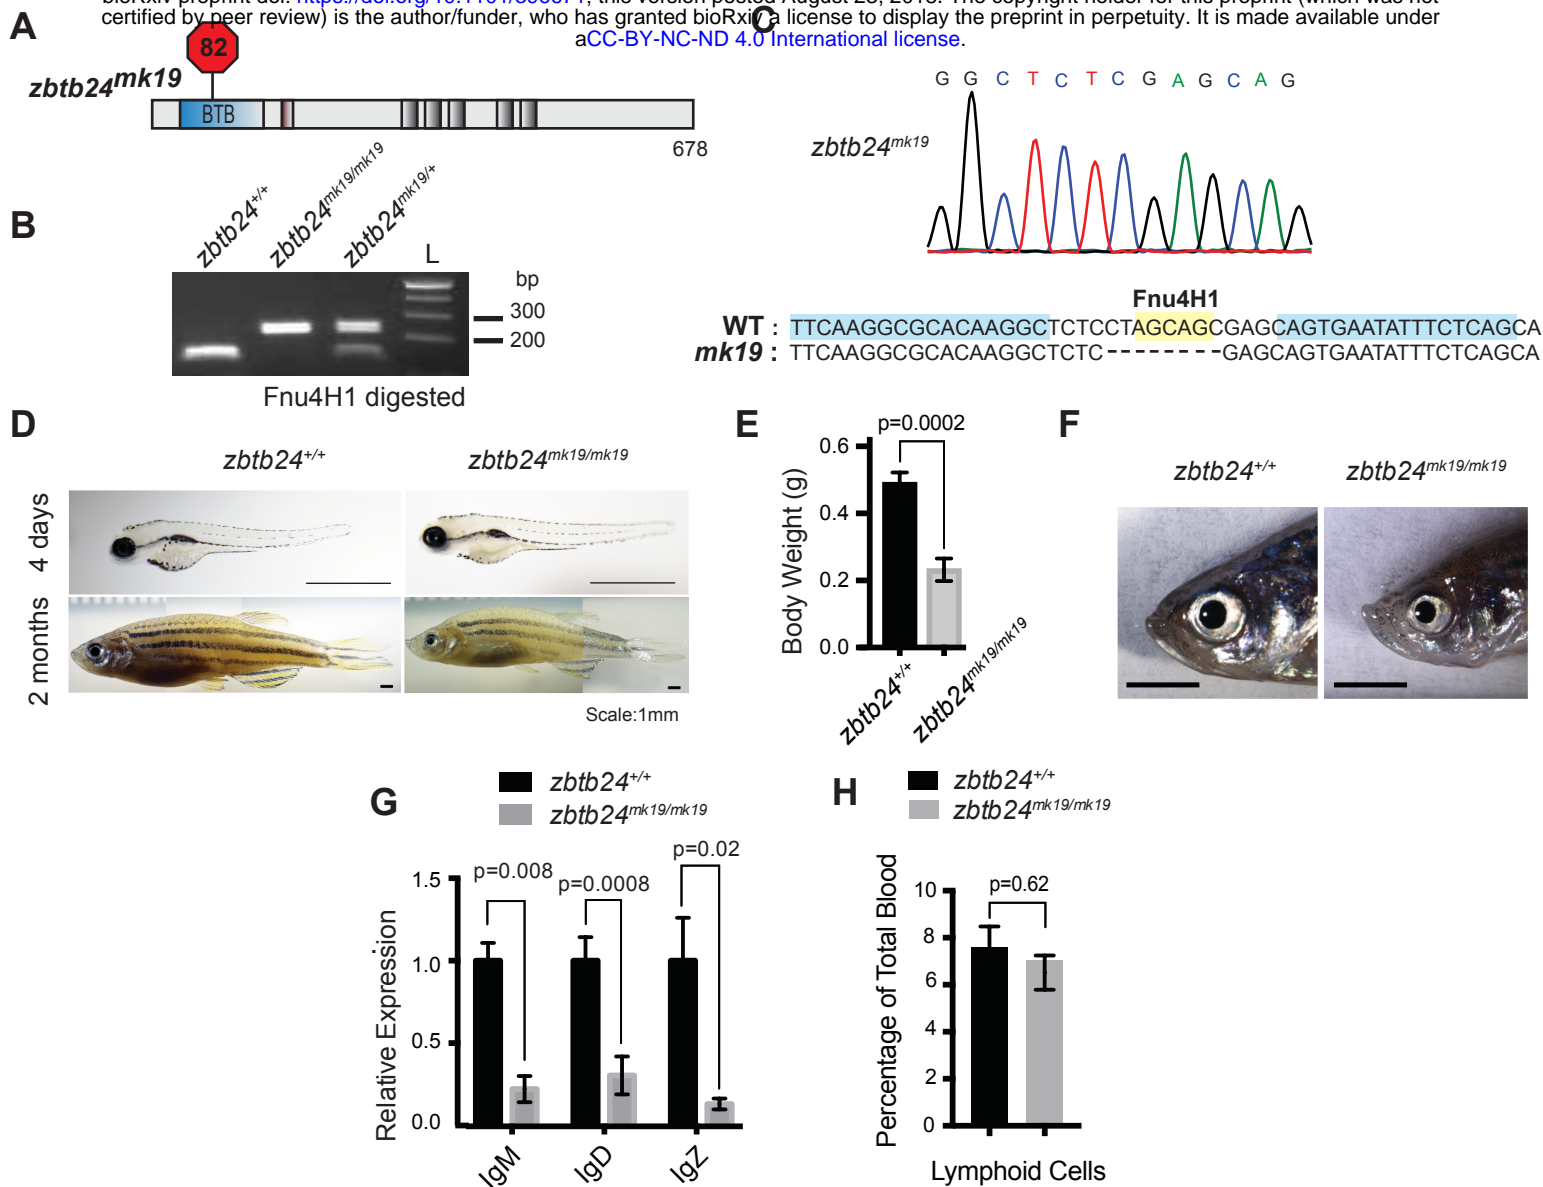

**Figure 1-figure supplement 3. A second mutant allele of *zbtb24* recapitulates key features of ICF Syndrome.**

(A) Schematic of *zbtb24<sup>mk19</sup>* with premature stop codon at aa 82. (B) Representative genotyping of *zbtb24<sup>mk19</sup>* allele. (C) Sequence trace confirming generation of small deletion allele, *zbtb24<sup>mk19</sup>*. (D) Representative bright field image of *zbtb24<sup>+/+</sup>* and *zbtb24<sup>mk19/mk19</sup>* zebrafish at 4 days and 2 months after fertilization. Scale bar: 1mm. (E) Quantification of body weight of *zbtb24<sup>+/+</sup>* and *zbtb24<sup>mk19/mk19</sup>* zebrafish at 5 months ( $n \geq 6$  biological replicates). (F) Facial abnormalities in *zbtb24<sup>+/+</sup>* and *zbtb24<sup>mk19/mk19</sup>* zebrafish. Scale bar: 3 mm. (G) qRT-PCR analysis of IgM, IgD and IgZ zebrafish immunoglobulins in *zbtb24<sup>+/+</sup>* and *zbtb24<sup>mk19/mk19</sup>* zebrafish measured at 6 weeks post fertilization ( $n=5$  biological replicates). (H) Quantification of lymphoid cell populations in total blood isolated from *zbtb24<sup>+/+</sup>* and *zbtb24<sup>mk19/mk19</sup>* adult kidney marrow, measured by Forward/Side scatter flow cytometry ( $n=16$  biological replicates). All error bars indicate standard error of the mean (SEM).



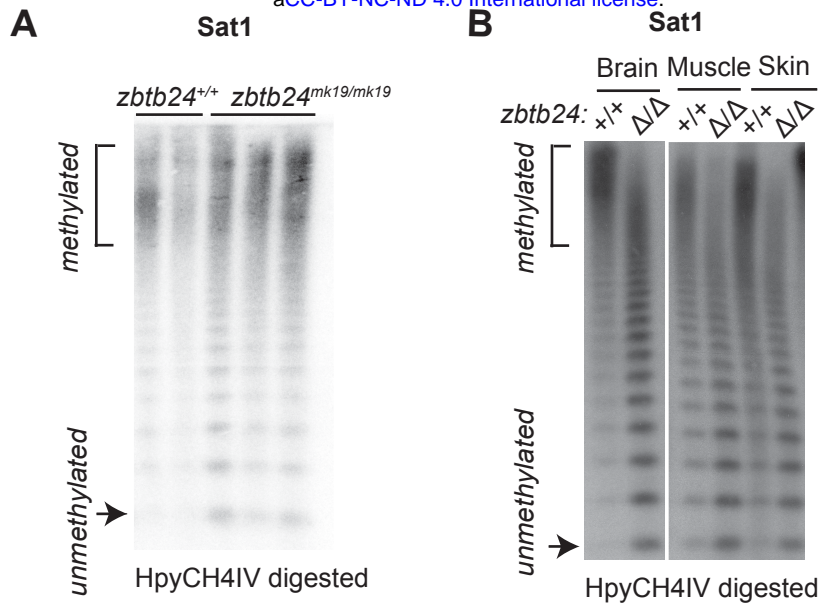

**Figure 2-figure supplement 1. *Zbtb24* mutation causes methylation loss at pericentromeric repeats.**

(A) Southern blot of genomic DNA digested with 5mC-sensitive restriction enzyme HpyCH4IV and probed with zebrafish Sat1 sequence. Genomic DNA was isolated at 1 month from *zbtb24*<sup>+/+</sup> and *zbtb24*<sup>mk19/mk19</sup> animals. Each lane represents a biological replicate for the indicated genotype. (B) Southern blot of genomic DNA from different tissues in *zbtb24*<sup>+/+</sup> and *zbtb24*<sup>ΔΔ</sup> digested with 5mC-sensitive restriction enzyme HpyCH4IV and probed with zebrafish Sat1 sequence. Each lane represents pooled DNA samples of the indicated tissue from 3 zebrafish adults.

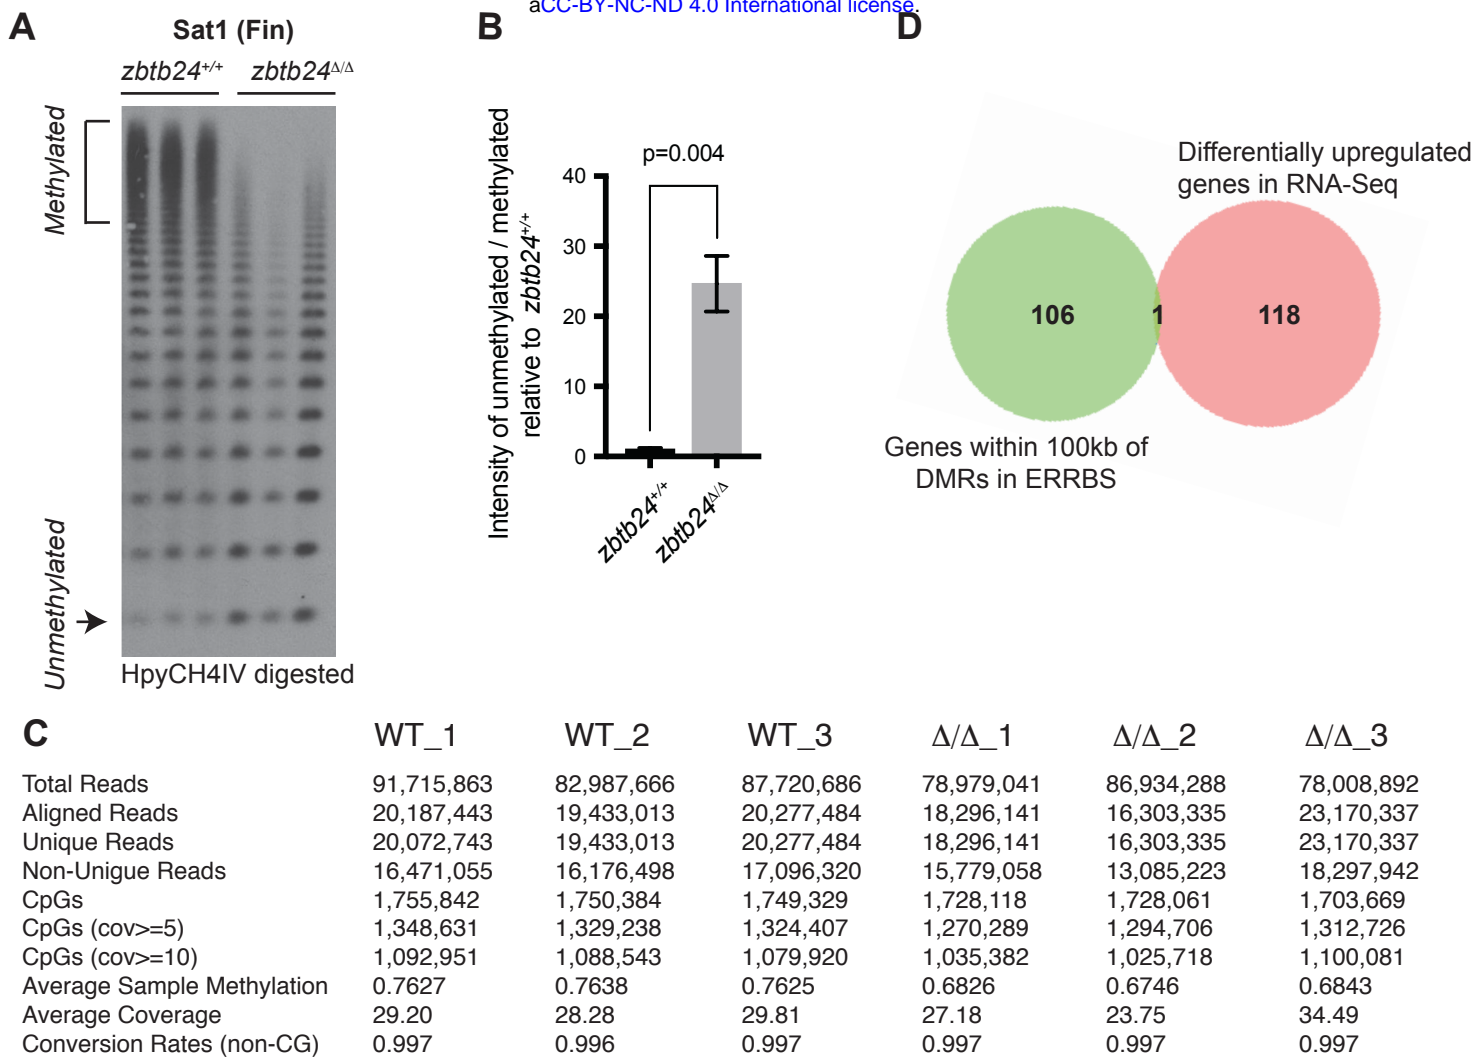

**Figure 2-figure supplement 2. *Zbtb24* mutants exhibit modest reductions in 5mC at non-pericentromeric sequences**  
**(A-B)** Southern Blot and quantification of HpyCH4IV digestion at Sat1 sequences in fin tissues used for ERRBS. **(C)** Basic statistics of ERRBS analysis in *zbtb24*<sup>+/+</sup> and *zbtb24*<sup>Δ/Δ</sup> zebrafish. **(D)** Venn diagram summarizing the overlap between differentially upregulated genes from RNA-Seq (right circle) and genes within 100kb of all DMRs in ERRBS tested for differential expression (left circle).

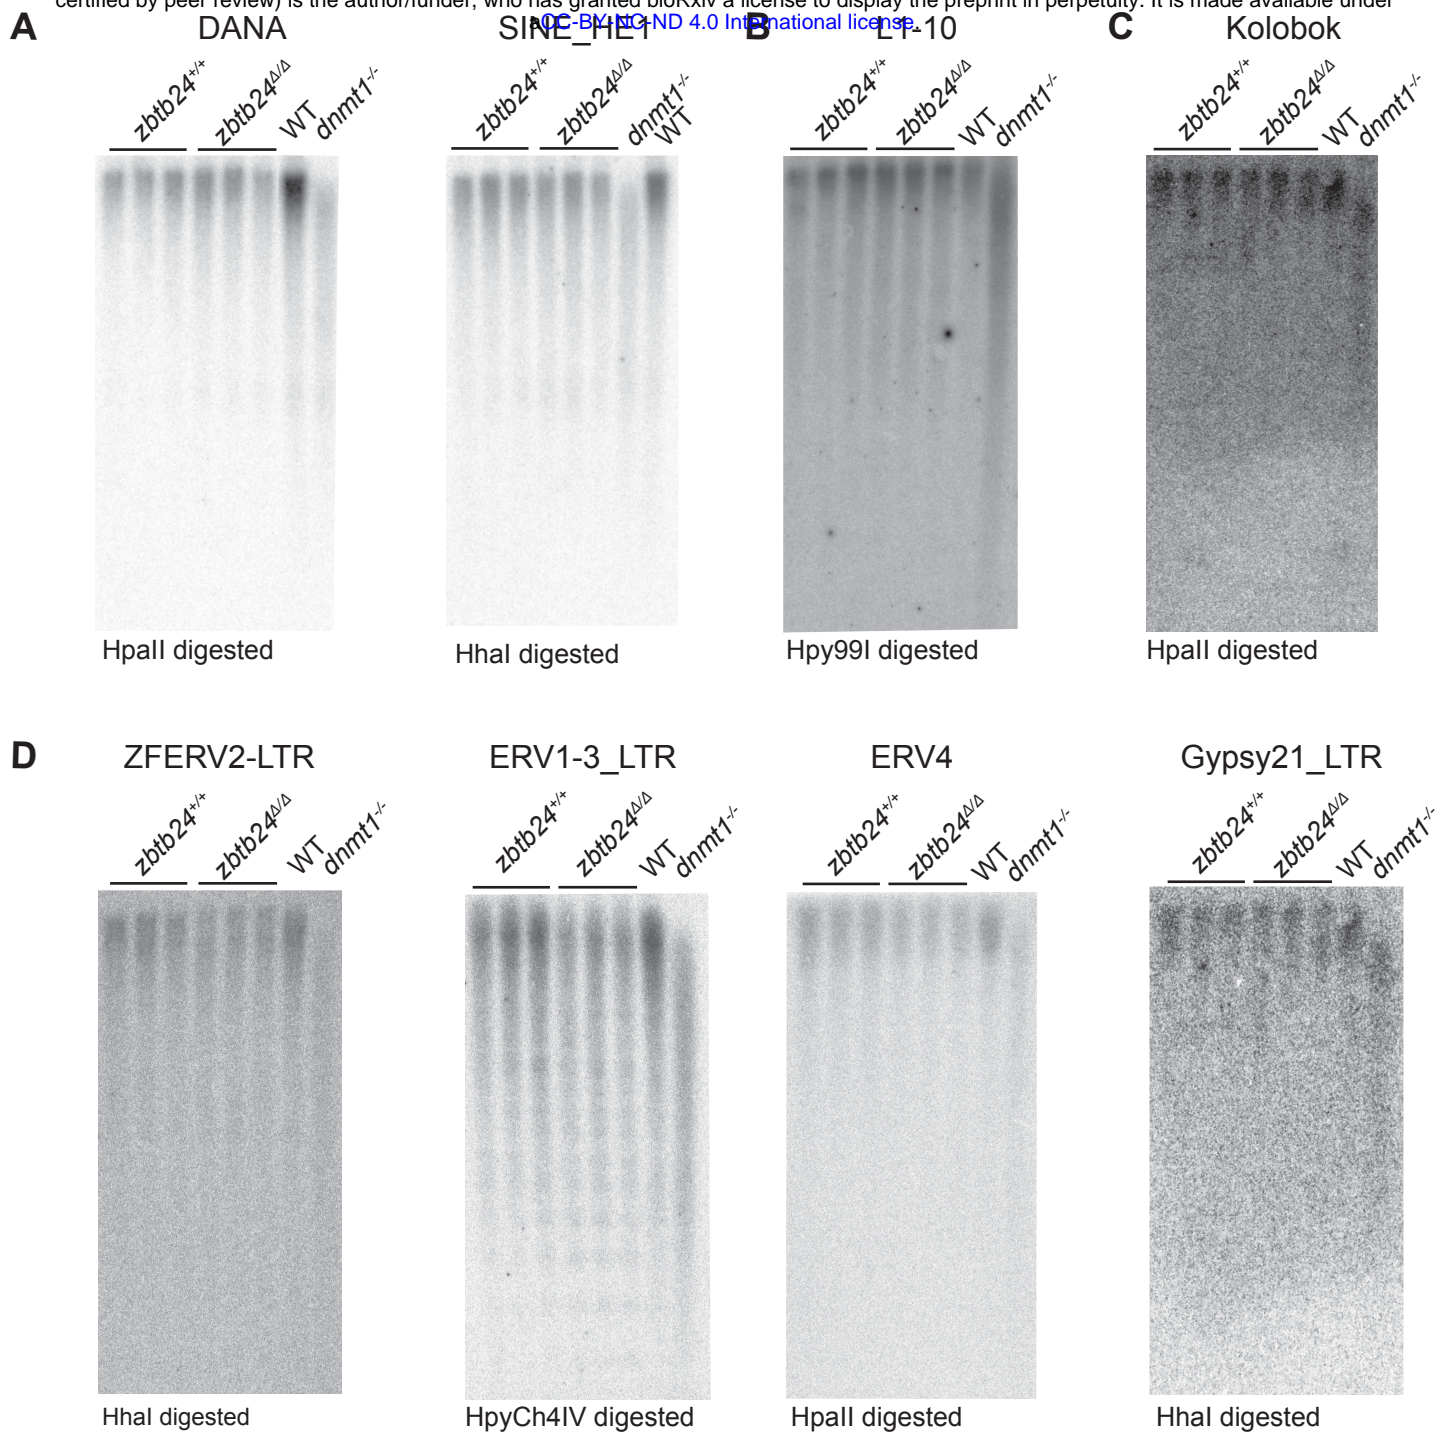

**Figure 2-figure supplement 3. Methylation at interspersed repeats is unaffected in *zbtb24* mutants.**

Southern blot analysis of DNA methylation at interspersed repeats (A) Short Interspersed Nuclear Element (SINE), DANA and SINE\_HE1 (B) Long Interspersed Nuclear Element (LINE), L1-10 (C) DNA Transposon, Kolobok (D) Endogenous Retroviral (ERV) elements, ZFERV2, ERV1-3, ERV4 and Gypsy21 in *zbtb24*<sup>+/+</sup> and *zbtb24*<sup>Δ/Δ</sup> 1-month old zebrafish. Each lane represents a biological replicate of the indicated genotype. Genomic DNA from *dnmt1*<sup>-/-</sup> embryos is used as a positive control. The methylation-sensitive enzyme used to digest genomic DNA is indicated below the respective blot.

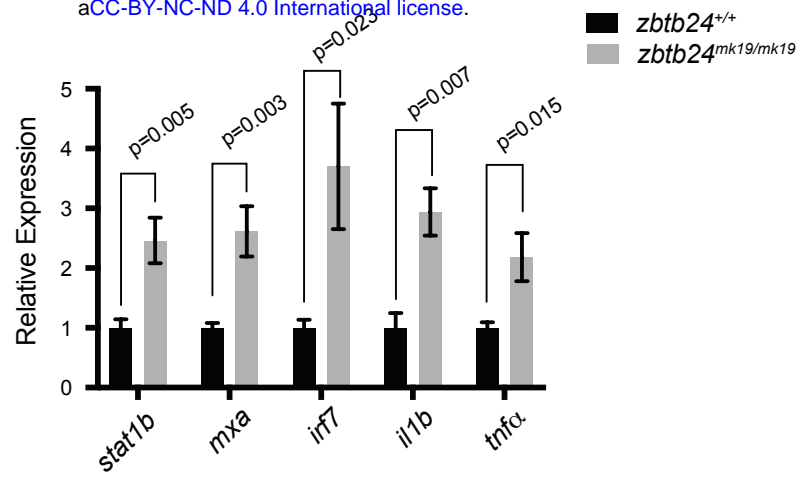

**Figure 3-figure supplement 1. Mutation in *zbtb24* leads to activation of innate immune response pathways.**

qRT-PCR validation of genes that are part of the innate immune response pathway that are also upregulated in *zbtb24*<sup>mk19/mk19</sup> zebrafish at 3 wpf. Error bars indicate SEM from 5 biological replicates.

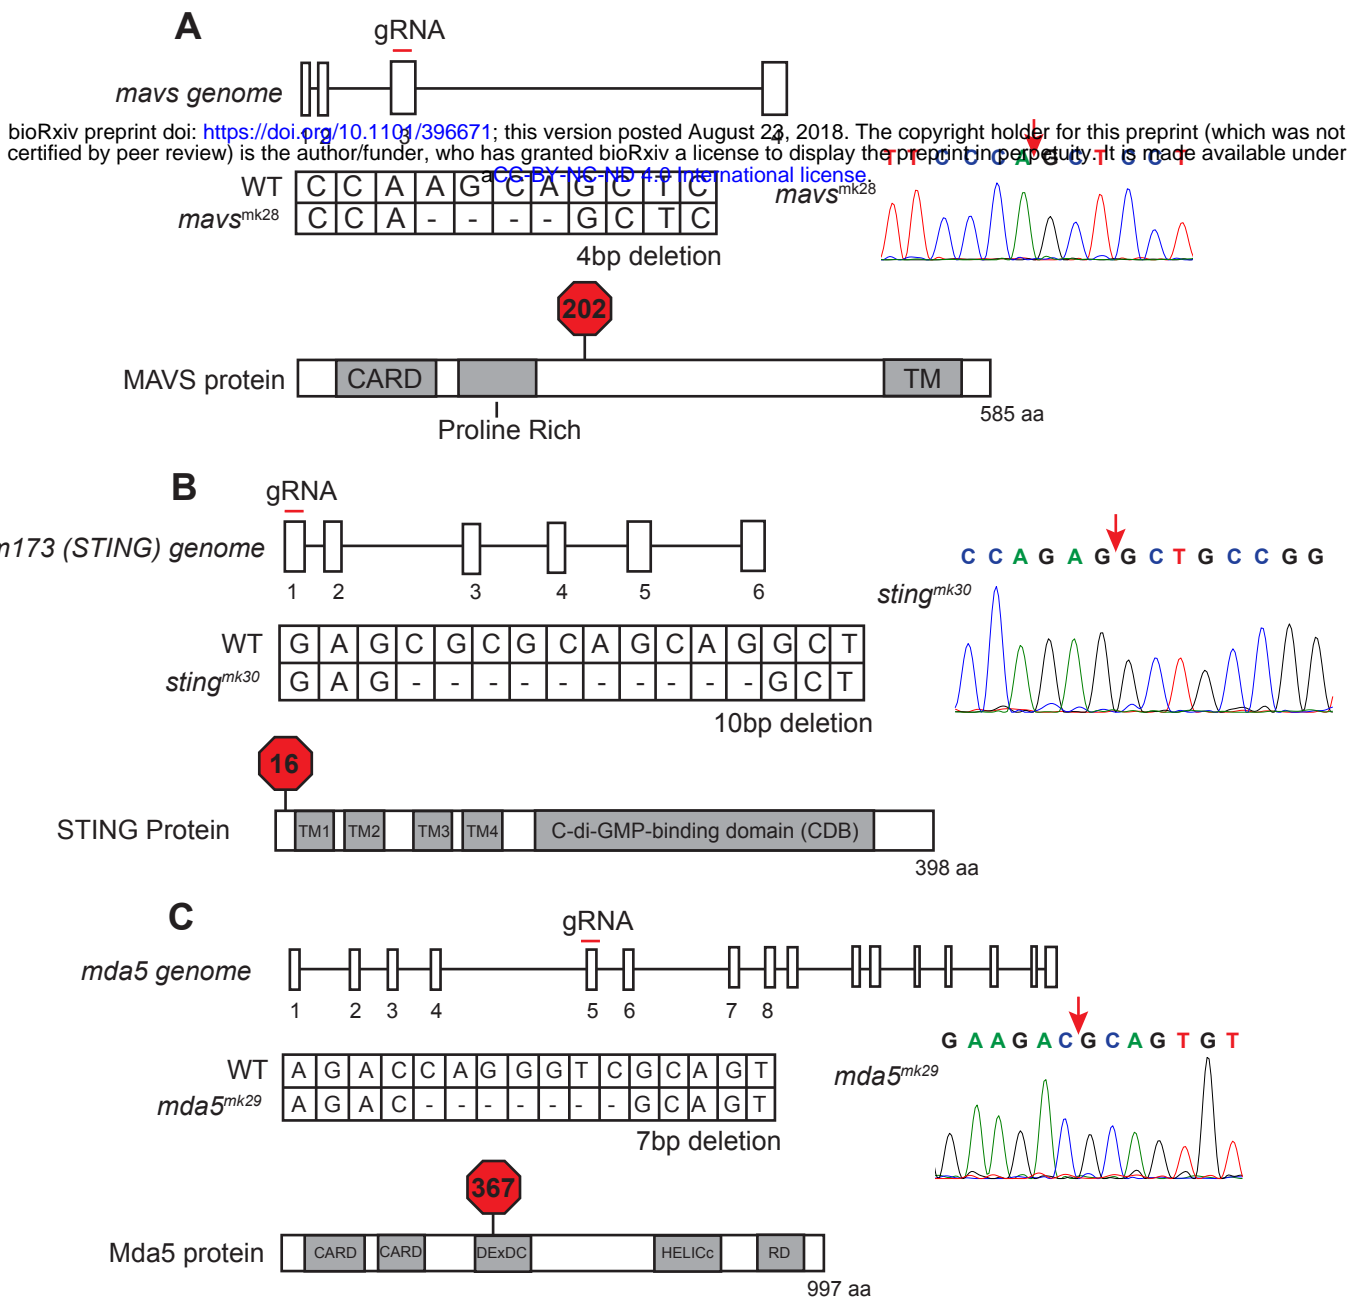

**Figure 4-figure supplement 1. Mutation of zebrafish orthologs of *mavs*, *sting*, and *mda5*.**

(A) Schematic of mutation in *mavs* including position of targeted gRNA, sequence information of the mutation, and location of predicted STOP codon. (B) Schematic of mutation in *sting* including position of targeted gRNA, sequence information of the mutation, and location of predicted STOP codon. (C) Schematic of mutation in *mda5* including position of targeted gRNA, sequence information of the mutation, and location of predicted STOP codon. The site of deletion is indicated with a red arrow on the sequence trace.

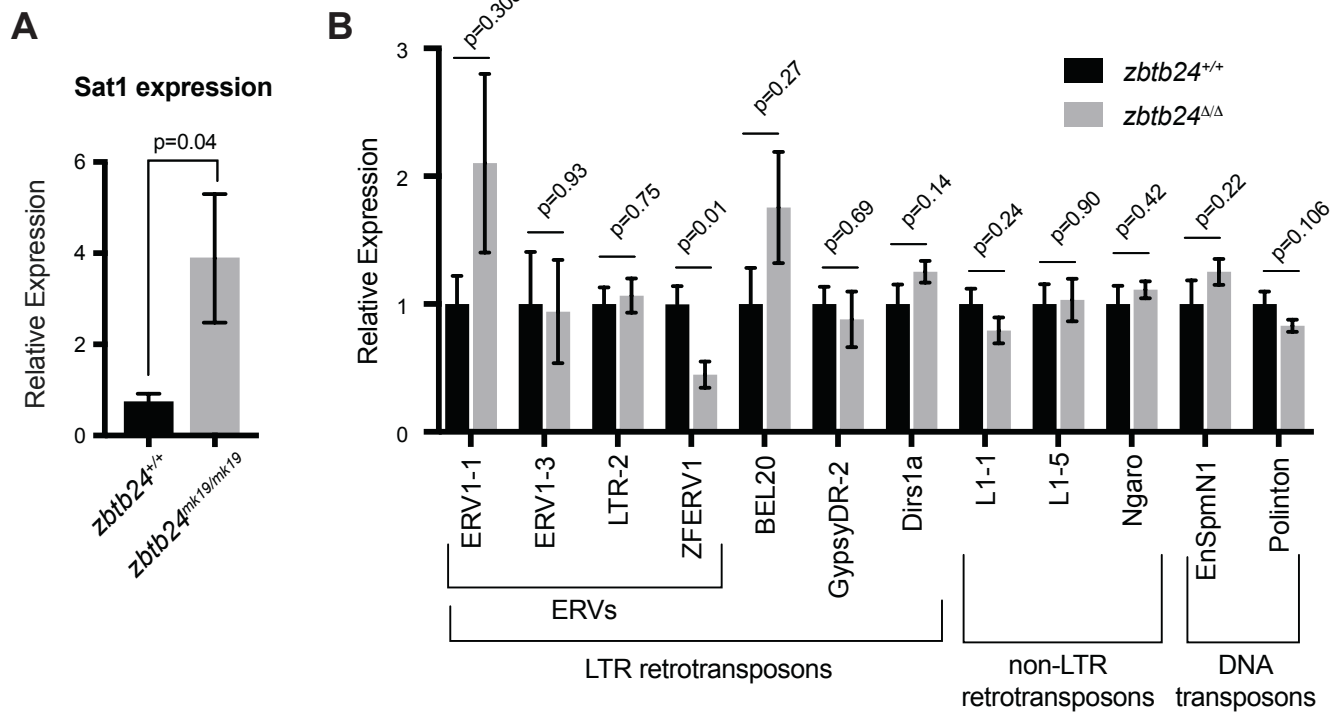

**Figure 5-figure supplement 1. Mutation in *zbtb24* upregulates *Sat1* transcripts but not transposons.**

(A) qRT-PCR of *Sat1* RNA in *zbtb24<sup>+/+</sup>* and *zbtb24<sup>mk19/mk19</sup>* zebrafish at 6 wpf. Error bars indicate SEM from at least 3 biological replicates. (B) qRT-PCR reveals similar levels of expression from transposable elements in *zbtb24<sup>+/+</sup>* and *zbtb24<sup>ΔΔ</sup>* zebrafish at 6 wpf. Error bars indicate SEM from 4-8 biological replicates.
